# Supplementary material for: Upregulation of TRPM3 in nociceptors innervating inflamed tissue
Source: eLife. 2020 Sep 3;9:e61103. doi: 10.7554/eLife.61103 (PMC7470828; doi:10.7554/eLife.61103)
Supplement: Figure 1—source data 1. [file elife-61103-fig1-data1.xlsx]

## Sheet: RNAscope dots per cell
TRPM3				TRPA1				TRPV1
Contralateral		Ipsilateral		Contralateral		Ipsilateral		Contralateral		Ipsilateral
WGA-	WGA+	WGA-	WGA+	WGA-	WGA+	WGA-	WGA+	WGA-	WGA+	WGA-	WGA+
1	44	1	20	22	27	10	41	4	0	0	2
1	4	0	129	40	1	13	19	1	23	36	20
4	42	3	56	3	1	4	5	1	245	2	0
29	8	0	19	3	5	167	5	98	157	48	17
69	14	6	9	2	0	5	2	0	1	0	8
0	15	0	13	4	1	150	25	28	272	13	1
20	6	2	4	0	1	1	3	0	1	4	36
37	37	27	21	0	51	192	11	1	2	1	12
4	36	4	60	0	0	2	147	2	1	119	5
7	4	0	51	1	30	8	6	13	3	4	2
6	54	2	34	0	2	6	72	2	2	0	0
15	20	0	61	1	2	58	2	0	0	2	93
0	17	21	91	1	3	96	32	6	79	54	2
3	19	2	8	0	17	16	3	38	2	0	20
4	3	16	55	30	9	231	9	0	5	0	1
18	28	17	17	120	18	41	14	1	0	0	0
9	30	9	72	15	285	6	2	0	16	0	40
63	30	1	29	3	0	82	0	9	1	0	46
18	2	1	12	3	0	0	9	0	208	11	3
5	13	0	21	6	32	6	34	42	4	28	9
2	39	8	20	3	17	16	2	0	1	0	24
14	22	4	8	123	5	9	2	7	768	0	10
6	4	22	60	109	11	1	3	0	197	77	19
2	25	1	73	1	68	0	5	0	8	0	1
4	57	1	1	0	3	1	22	1	56	0	2
22	34	4	45	13	1	2	1	105	260	1	0
2	3	0	63	0	23	1	3	13	2	0	0
3	145	44	41	2	0	84	0	15	3	0	71
1	4	37	16	0	14	0	3	6	3	0	0
17	27	1	95	17	4	2	0	0	244	3	6
7	7	5	51	8	20	2	35	63	0	0	46
7	37	1	31	0	33	0	26	10	3	1	5
0	13	4	52	1	0	24	1	7	335	26	6
4	11	15	6	0	11	14	2	175	2	52	1
23	2	26	83	62	0	6	44	9	0	0	84
0	11	1	21	57	36	13	4	3	0	0	2
5	44	22	19	0	3	8	2	3	6	29	24
5	19	16	16	0	30	0	299	78	29	0	14
0	18	20	9	0	7	5	236	24	20	7	534
12	47	7	52	0	20	1	22	7	1	17	0
3	8	0	4	21	35	32	0	1	190	0	1
11	15	2	18	0	47	2	87	13	279	2	153
8	10	0	25	0	0	99	2	17	2	1	3
4	19	24	49	56	44	1	7	10	10	0	68
19	9	26	6	3	2	4	1	0	8	1	113
7	35	16	58	63	1	16	1	10	0	20	9
10	10	23	12	91	6	7	22	21	51	0	115
17	0	12	30	0	3	107	87	0	4	29	672
18	0	0	32	8	9	76	4	5	288	2	1
1	13	2	16	3	1	1	11	15	291	2	386
12	58	32	103	2	65	4	4	0	1	0	475
3	17	28	26	5	28	123	0	16	1	1	6
11	4	21	44	1	2	1	631	0	1	3	10
0	2	18	60	70	4	13	9	3	15	44	164
0	38	6	10	0	106	1	46	30	188	129	1
1	22	6	138	0	1	5	2	1	0	0	101
50	22	8	67	12	71	60	4	2	386	3	14
29	12	2	11	36	7	78	38	20	64	2	41
27	20	7	8	81	3	5	3	0	0	42	0
1	3	7	43	0	4	105	98	21	3	0	343
37	43	17	24	0	33	6	42	16	314	0	111
13	2	14	9	0	11	11	11	0	2	0	337
82	26	1	24	22	152	3	0	3	222	42	0
3	4	65	21	7	10	51	2	4	247	0	273
19	32	0	42	59	22	0	10	0	45	0	9
2	11	9	35	0	0	6	3	32	274	44	233
1	60	28	50	3	20	2	37	1	0	89	5
25	3	3	89	0	0	20	710	1	1	1	234
6	13	15	4	6	3	22	0	1	6	51	20
21	3	14	7	59	0	1	170	167	3	123	2
32	--	30	6	139	38	80	8	2	1	11	185
37	--	10	11	33	--	9	3	0	3	0	6
43	--	103	6	5	--	7	13	212	3	0	5
3	--	20	18	25	--	3	61	4	185	10	178
14	--	3	30	0	--	208	36	23	27	0	40
7	--	10	8	0	--	1	9	0	1	1	216
6	--	33	--	17	--	1	264	6	289	3	171
47	--	28	--	36	--	3	53	6	7	1	308
20	--	11	--	66	--	11	17	1	4	83	66
16	--	22	--	6	--	1	6	42	6	0	9
22	--	16	--	0	--	32	--	0	4	365	268
17	--	28	--	1	--	40	--	2	142	0	1
3	--	1	--	75	--	66	--	3	0	10	124
0	--	38	--	0	--	8	--	56	0	4	5
52	--	4	--	79	--	10	--	0	230	4	624
29	--	8	--	0	--	5	--	1	496	1	8
16	--	13	--	69	--	8	--	2	181	83	218
29	--	81	--	104	--	0	--	43	--	22	25
6	--	33	--	71	--	4	--	5	--	3	2
5	--	4	--	8	--	10	--	53	--	0	0
2	--	34	--	65	--	1	--	98	--	1	5
4	--	3	--	17	--	154	--	20	--	0	124
52	--	2	--	0	--	1	--	9	--	1	43
13	--	4	--	0	--	6	--	0	--	1	69
1	--	6	--	0	--	290	--	12	--	2	21
0	--	14	--	0	--	15	--	3	--	77	97
76	--	17	--	0	--	1	--	112	--	0	4
16	--	46	--	1	--	1	--	1	--	0	1
23	--	1	--	0	--	3	--	15	--	0	0
2	--	17	--	0	--	22	--	1	--	0	5
23	--	13	--	70	--	2	--	85	--	1	31
0	--	3	--	2	--	2	--	3	--	135	155
11	--	10	--	53	--	0	--	0	--	0	2
9	--	10	--	15	--	26	--	3	--	109	0
5	--	4	--	2	--	0	--	10	--	2	1
2	--	4	--	40	--	21	--	102	--	66	2
88	--	25	--	0	--	23	--	7	--	3	1
1	--	0	--	9	--	2	--	154	--	2	13
2	--	19	--	11	--	2	--	30	--	0	2
12	--	51	--	6	--	35	--	1	--	17	19
6	--	4	--	0	--	5	--	0	--	137	--
31	--	8	--	51	--	109	--	12	--	34	--
44	--	31	--	2	--	26	--	3	--	1	--
4	--	12	--	127	--	194	--	1	--	1	--
10	--	45	--	33	--	263	--	1	--	0	--
88	--	32	--	1	--	85	--	6	--	85	--
0	--	63	--	0	--	128	--	12	--	0	--
42	--	18	--	41	--	2	--	24	--	0	--
31	--	30	--	12	--	9	--	114	--	98	--
29	--	26	--	60	--	26	--	0	--	80	--
22	--	47	--	0	--	93	--	1	--	42	--
25	--	62	--	74	--	13	--	147	--	131	--
71	--	10	--	6	--	148	--	0	--	1	--
8	--	38	--	82	--	0	--	5	--	0	--
5	--	3	--	0	--	3	--	23	--	0	--
43	--	28	--	77	--	128	--	128	--	117	--
5	--	10	--	12	--	161	--	0	--	35	--
0	--	42	--	3	--	7	--	2	--	1	--
51	--	16	--	4	--	85	--	79	--	74	--
21	--	31	--	65	--	120	--	0	--	2	--
25	--	42	--	89	--	0	--	1	--	0	--
0	--	30	--	1	--	18	--	4	--	397	--
26	--	20	--	0	--	65	--	0	--	0	--
1	--	1	--	44	--	2	--	11	--	1	--
19	--	19	--	28	--	497	--	3	--	38	--
1	--	15	--	121	--	265	--	1	--	8	--
6	--	70	--	34	--	4	--	38	--	10	--
31	--	30	--	71	--	158	--	0	--	0	--
28	--	23	--	23	--	22	--	1	--	6	--
8	--	34	--	76	--	13	--	11	--	45	--
1	--	30	--	20	--	38	--	27	--	4	--
23	--	39	--	301	--	3	--	5	--	2	--
16	--	1	--	28	--	124	--	3	--	210	--
11	--	2	--	52	--	1	--	0	--	14	--
1	--	4	--	5	--	2	--	8	--	3	--
4	--	37	--	4	--	28	--	31	--	385	--
4	--	7	--	24	--	150	--	52	--	34	--
63	--	30	--	0	--	109	--	9	--	7	--
6	--	3	--	8	--	27	--	52	--	4	--
36	--	50	--	1	--	2	--	12	--	1	--
19	--	12	--	97	--	14	--	55	--	14	--
22	--	34	--	1	--	3	--	11	--	0	--
48	--	3	--	134	--	183	--	57	--	9	--
58	--	3	--	103	--	36	--	29	--	95	--
45	--	7	--	47	--	71	--	72	--	2	--
55	--	32	--	2	--	31	--	1	--	107	--
12	--	18	--	52	--	49	--	25	--	0	--
18	--	50	--	1	--	184	--	203	--	6	--
3	--	26	--	19	--	12	--	38	--	6	--
42	--	18	--	150	--	14	--	2	--	0	--
24	--	9	--	8	--	17	--	6	--	0	--
66	--	11	--	119	--	145	--	1	--	1	--
14	--	16	--	9	--	0	--	5	--	262	--
20	--	17	--	19	--	137	--	219	--	12	--
26	--	27	--	11	--	246	--	107	--	0	--
1	--	6	--	116	--	46	--	7	--	0	--
60	--	58	--	3	--	154	--	0	--	23	--
62	--	33	--	62	--	14	--	7	--	0	--
28	--	1	--	21	--	36	--	0	--	0	--
43	--	45	--	13	--	30	--	4	--	0	--
19	--	13	--	32	--	13	--	13	--	0	--
0	--	30	--	85	--	297	--	172	--	1	--
4	--	17	--	4	--	2	--	6	--	17	--
24	--	24	--	25	--	60	--	61	--	1	--
0	--	6	--	7	--	1	--	0	--	0	--
13	--	17	--	27	--	152	--	26	--	19	--
49	--	5	--	79	--	116	--	2	--	5	--
15	--	17	--	1	--	147	--	15	--	1	--
8	--	11	--	301	--	0	--	27	--	0	--
42	--	7	--	108	--	3	--	0	--	29	--
52	--	44	--	2	--	0	--	12	--	0	--
40	--	30	--	91	--	3	--	429	--	1	--
6	--	13	--	24	--	12	--	6	--	0	--
31	--	0	--	10	--	7	--	2	--	0	--
59	--	7	--	24	--	107	--	6	--	4	--
13	--	3	--	63	--	2	--	5	--	1	--
18	--	5	--	3	--	22	--	12	--	35	--
33	--	5	--	2	--	70	--	54	--	1	--
34	--	3	--	81	--	1	--	1	--	12	--
3	--	3	--	10	--	1	--	8	--	146	--
28	--	37	--	1	--	2	--	0	--	0	--
28	--	37	--	5	--	11	--	9	--	189	--
1	--	2	--	7	--	73	--	1	--	0	--
15	--	28	--	0	--	0	--	72	--	0	--
18	--	23	--	0	--	2	--	36	--	3	--
37	--	51	--	4	--	37	--	14	--	37	--
0	--	27	--	1	--	1	--	6	--	153	--
23	--	103	--	9	--	2	--	1	--	118	--
77	--	16	--	1	--	4	--	76	--	0	--
7	--	5	--	75	--	2	--	1	--	3	--
35	--	14	--	4	--	0	--	304	--	1	--
56	--	6	--	23	--	0	--	57	--	5	--
11	--	6	--	3	--	7	--	8	--	1	--
34	--	25	--	19	--	0	--	4	--	6	--
2	--	6	--	2	--	23	--	47	--	1	--
31	--	18	--	1	--	2	--	0	--	18	--
81	--	40	--	23	--	0	--	97	--	5	--
56	--	28	--	1	--	0	--	2	--	42	--
15	--	35	--	4	--	2	--	2	--	113	--
8	--	8	--	0	--	47	--	34	--	2	--
11	--	47	--	55	--	25	--	274	--	1	--
13	--	10	--	56	--	1	--	200	--	2	--
3	--	20	--	0	--	111	--	1	--	11	--
0	--	21	--	55	--	15	--	1	--	4	--
26	--	23	--	71	--	10	--	0	--	384	--
35	--	1	--	0	--	48	--	416	--	29	--
5	--	3	--	23	--	39	--	1	--	0	--
7	--	0	--	31	--	1	--	2	--	5	--
8	--	3	--	0	--	45	--	31	--	3	--
25	--	37	--	5	--	0	--	3	--	86	--
2	--	0	--	2	--	50	--	10	--	1	--
14	--	16	--	41	--	49	--	1	--	10	--
11	--	33	--	2	--	0	--	1	--	53	--
80	--	20	--	28	--	51	--	1	--	5	--
39	--	43	--	2	--	0	--	5	--	117	--
15	--	29	--	49	--	0	--	30	--	50	--
25	--	1	--	4	--	0	--	0	--	152	--
63	--	5	--	2	--	93	--	0	--	17	--
58	--	16	--	0	--	1	--	3	--	10	--
1	--	3	--	0	--	0	--	47	--	96	--
9	--	32	--	6	--	129	--	3	--	0	--
2	--	1	--	3	--	8	--	1	--	0	--
3	--	24	--	14	--	6	--	61	--	170	--
66	--	9	--	32	--	4	--	0	--	1	--
16	--	3	--	0	--	13	--	249	--	9	--
40	--	0	--	176	--	8	--	55	--	13	--
20	--	48	--	18	--	3	--	152	--	0	--
1	--	9	--	57	--	2	--	2	--	5	--
26	--	26	--	0	--	73	--	4	--	0	--
45	--	50	--	70	--	16	--	5	--	7	--
13	--	15	--	102	--	3	--	510	--	103	--
77	--	20	--	48	--	6	--	52	--	29	--
19	--	19	--	6	--	16	--	0	--	0	--
63	--	9	--	1	--	10	--	0	--	7	--
1	--	6	--	2	--	29	--	1	--	308	--
133	--	23	--	99	--	16	--	5	--	9	--
53	--	2	--	22	--	35	--	1	--	0	--
49	--	19	--	0	--	29	--	126	--	1	--
9	--	3	--	0	--	36	--	1	--	0	--
1	--	21	--	0	--	144	--	3	--	198	--
9	--	53	--	48	--	11	--	223	--	0	--
56	--	21	--	0	--	1	--	28	--	17	--
111	--	6	--	1	--	11	--	2	--	7	--
6	--	31	--	2	--	3	--	4	--	0	--
25	--	0	--	0	--	2	--	3	--	15	--
12	--	4	--	27	--	4	--	14	--	13	--
9	--	2	--	1	--	5	--	12	--	0	--
2	--	46	--	0	--	126	--	26	--	36	--
52	--	17	--	1	--	20	--	12	--	100	--
29	--	31	--	10	--	0	--	154	--	31	--
23	--	32	--	1	--	139	--	2	--	14	--
1	--	3	--	73	--	5	--	1	--	252	--
20	--	7	--	0	--	15	--	2	--	61	--
7	--	26	--	0	--	49	--	33	--	7	--
7	--	1	--	15	--	3	--	100	--	1	--
38	--	34	--	6	--	3	--	6	--	13	--
5	--	46	--	8	--	6	--	17	--	0	--
12	--	42	--	145	--	44	--	73	--	4	--
31	--	1	--	60	--	1	--	1	--	583	--
63	--	12	--	0	--	11	--	79	--	14	--
10	--	40	--	0	--	58	--	134	--	0	--
2	--	81	--	26	--	12	--	0	--	1	--
100	--	46	--	0	--	114	--	0	--	0	--
28	--	39	--	0	--	93	--	11	--	65	--
16	--	8	--	59	--	0	--	0	--	0	--
6	--	16	--	3	--	1	--	92	--	22	--
29	--	21	--	7	--	58	--	1	--	120	--
28	--	77	--	1	--	1	--	1	--	2	--
40	--	6	--	4	--	65	--	37	--	44	--
6	--	4	--	50	--	0	--	128	--	5	--
1	--	48	--	37	--	17	--	186	--	0	--
25	--	33	--	0	--	8	--	3	--	3	--
12	--	9	--	16	--	0	--	4	--	1	--
27	--	65	--	121	--	31	--	11	--	0	--
68	--	2	--	39	--	0	--	0	--	20	--
9	--	55	--	4	--	1	--	3	--	1	--
44	--	0	--	78	--	0	--	4	--	3	--
5	--	6	--	60	--	4	--	2	--	571	--
20	--	162	--	0	--	0	--	3	--	2	--
16	--	14	--	0	--	1	--	48	--	5	--
9	--	8	--	0	--	0	--	108	--	31	--
58	--	42	--	5	--	8	--	5	--	0	--
56	--	2	--	3	--	29	--	6	--	7	--
3	--	39	--	156	--	1	--	26	--	137	--
40	--	9	--	26	--	2	--	1	--	9	--
37	--	27	--	10	--	0	--	244	--	1	--
33	--	57	--	13	--	1	--	2	--	27	--
10	--	40	--	81	--	124	--	175	--	0	--
14	--	50	--	5	--	0	--	0	--	37	--
7	--	29	--	1	--	18	--	0	--	1	--
34	--	49	--	10	--	4	--	4	--	50	--
4	--	13	--	38	--	3	--	13	--	2	--
82	--	0	--	1	--	6	--	4	--	65	--
9	--	46	--	62	--	28	--	1	--	1	--
33	--	3	--	14	--	12	--	0	--	25	--
12	--	36	--	1	--	2	--	49	--	12	--
6	--	18	--	88	--	1	--	126	--	1	--
4	--	4	--	25	--	0	--	0	--	63	--
53	--	12	--	92	--	78	--	61	--	2	--
26	--	23	--	1	--	1	--	19	--	0	--
8	--	5	--	147	--	65	--	2	--	0	--
6	--	17	--	2	--	0	--	101	--	12	--
6	--	0	--	5	--	13	--	80	--	9	--
51	--	19	--	157	--	55	--	98	--	1	--
1	--	106	--	1	--	1	--	12	--	8	--
4	--	58	--	0	--	8	--	202	--	1	--
57	--	55	--	1	--	0	--	7	--	0	--
3	--	17	--	21	--	12	--	1	--	1	--
33	--	104	--	80	--	38	--	1	--	77	--
70	--	12	--	122	--	111	--	0	--	1012	--
14	--	15	--	1	--	124	--	1	--	219	--
47	--	5	--	6	--	2	--	1	--	140	--
1	--	14	--	17	--	2	--	1	--	5	--
21	--	2	--	9	--	2	--	0	--	2	--
1	--	1	--	1	--	0	--	25	--	11	--
2	--	28	--	0	--	136	--	1	--	1	--
24	--	22	--	5	--	0	--	35	--	0	--
11	--	9	--	72	--	93	--	0	--	0	--
45	--	33	--	1	--	44	--	171	--	41	--
1	--	15	--	30	--	3	--	162	--	52	--
33	--	9	--	11	--	26	--	9	--	60	--
23	--	138	--	1	--	0	--	225	--	1	--
1	--	26	--	2	--	9	--	2	--	0	--
6	--	24	--	32	--	224	--	45	--	3	--
4	--	43	--	2	--	1	--	0	--	1	--
13	--	40	--	52	--	2	--	3	--	234	--
86	--	35	--	22	--	100	--	99	--	296	--
64	--	9	--	1	--	2	--	131	--	92	--
23	--	60	--	40	--	15	--	47	--	2	--
8	--	25	--	0	--	44	--	6	--	2	--
3	--	57	--	2	--	16	--	0	--	77	--
57	--	20	--	17	--	138	--	11	--	2	--
14	--	44	--	32	--	8	--	10	--	1	--
37	--	16	--	40	--	48	--	1	--	58	--
17	--	16	--	44	--	54	--	0	--	2	--
30	--	11	--	38	--	1	--	3	--	1	--
3	--	60	--	1	--	34	--	0	--	29	--
61	--	4	--	119	--	1	--	25	--	2	--
11	--	52	--	25	--	5	--	2	--	83	--
4	--	70	--	0	--	2	--	101	--	5	--
28	--	21	--	5	--	72	--	172	--	1	--
25	--	14	--	10	--	6	--	4	--	148	--
14	--	48	--	0	--	0	--	177	--	0	--
5	--	6	--	1	--	70	--	0	--	39	--
63	--	7	--	50	--	2	--	4	--	0	--
20	--	88	--	95	--	1	--	133	--	108	--
19	--	3	--	13	--	1	--	246	--	31	--
18	--	62	--	6	--	2	--	4	--	34	--
9	--	97	--	54	--	75	--	7	--	2	--
16	--	35	--	21	--	1	--	14	--	3	--
4	--	50	--	12	--	4	--	75	--	2	--
0	--	63	--	64	--	23	--	4	--	8	--
28	--	24	--	2	--	165	--	112	--	7	--
17	--	1	--	3	--	218	--	66	--	271	--
5	--	47	--	93	--	8	--	49	--	4	--
15	--	15	--	4	--	9	--	10	--	1	--
17	--	25	--	248	--	12	--	2	--	2	--
8	--	6	--	24	--	0	--	3	--	0	--
83	--	66	--	60	--	5	--	0	--	8	--
46	--	20	--	35	--	0	--	0	--	1	--
0	--	47	--	13	--	5	--	0	--	0	--
45	--	12	--	7	--	22	--	80	--	152	--
11	--	7	--	0	--	2	--	34	--	48	--
5	--	4	--	0	--	4	--	18	--	4	--
2	--	5	--	4	--	48	--	21	--	4	--
1	--	32	--	189	--	82	--	12	--	372	--
2	--	89	--	2	--	69	--	1	--	2	--
58	--	1	--	5	--	148	--	3	--	37	--
10	--	94	--	4	--	52	--	10	--	260	--
43	--	27	--	0	--	27	--	8	--	1	--
15	--	49	--	1	--	7	--	0	--	74	--
33	--	102	--	2	--	15	--	10	--	1	--
2	--	26	--	68	--	148	--	0	--	169	--
72	--	64	--	98	--	46	--	7	--	178	--
9	--	50	--	12	--	1	--	37	--	1	--
1	--	16	--	228	--	297	--	0	--	6	--
17	--	8	--	0	--	45	--	27	--	1	--
10	--	16	--	289	--	56	--	317	--	0	--
2	--	131	--	86	--	34	--	4	--	98	--
20	--	41	--	6	--	165	--	4	--	9	--
3	--	9	--	2	--	7	--	1	--	8	--
46	--	7	--	11	--	28	--	3	--	100	--
12	--	1	--	0	--	135	--	2	--	1	--
67	--	18	--	3	--	32	--	4	--	0	--
58	--	21	--	129	--	1	--	18	--	0	--
13	--	10	--	10	--	101	--	10	--	98	--
17	--	29	--	1	--	8	--	323	--	197	--
20	--	63	--	227	--	159	--	11	--	0	--
37	--	54	--	41	--	75	--	1	--	6	--
5	--	28	--	2	--	1	--	161	--	1	--
15	--	6	--	11	--	8	--	91	--	0	--
53	--	42	--	45	--	2	--	502	--	0	--
2	--	24	--	2	--	19	--	5	--	3	--
2	--	12	--	253	--	13	--	4	--	0	--
12	--	21	--	8	--	0	--	0	--	0	--
1	--	50	--	31	--	46	--	11	--	517	--
43	--	15	--	18	--	0	--	242	--	151	--
1	--	37	--	11	--	6	--	0	--	0	--
11	--	58	--	209	--	9	--	0	--	766	--
0	--	21	--	64	--	26	--	10	--	15	--
77	--	9	--	16	--	87	--	38	--	100	--
38	--	5	--	143	--	37	--	0	--	9	--
21	--	50	--	0	--	150	--	1	--	3	--
48	--	12	--	6	--	8	--	0	--	9	--
1	--	26	--	2	--	8	--	3	--	0	--
10	--	11	--	104	--	53	--	7	--	148	--
3	--	19	--	8	--	22	--	3	--	2	--
24	--	13	--	106	--	49	--	20	--	3	--
2	--	58	--	11	--	42	--	7	--	5	--
9	--	1	--	74	--	44	--	54	--	12	--
5	--	47	--	3	--	74	--	18	--	521	--
37	--	14	--	91	--	160	--	1	--	2	--
28	--	86	--	2	--	4	--	25	--	9	--
33	--	118	--	234	--	1	--	0	--	1	--
0	--	33	--	1	--	45	--	1	--	8	--
117	--	29	--	131	--	8	--	20	--	19	--
34	--	22	--	32	--	7	--	113	--	75	--
41	--	10	--	13	--	3	--	6	--	22	--
15	--	20	--	24	--	128	--	1	--	3	--
36	--	13	--	45	--	4	--	52	--	21	--
36	--	39	--	8	--	14	--	143	--	0	--
32	--	117	--	160	--	63	--	0	--	0	--
22	--	2	--	160	--	2	--	8	--	4	--
3	--	44	--	6	--	90	--	1	--	114	--
45	--	68	--	25	--	2	--	1	--	19	--
0	--	1	--	311	--	53	--	286	--	1	--
7	--	35	--	261	--	17	--	24	--	0	--
34	--	54	--	6	--	254	--	15	--	215	--
57	--	7	--	107	--	2	--	2	--	220	--
43	--	18	--	0	--	54	--	9	--	1	--
50	--	10	--	232	--	32	--	1	--	25	--
15	--	31	--	231	--	2	--	3	--	0	--
9	--	79	--	27	--	102	--	6	--	8	--
5	--	155	--	63	--	16	--	0	--	0	--
61	--	34	--	1	--	5	--	13	--	233	--
5	--	51	--	6	--	42	--	373	--	229	--
10	--	10	--	60	--	12	--	0	--	19	--
23	--	58	--	156	--	62	--	126	--	0	--
4	--	1	--	3	--	141	--	14	--	92	--
5	--	57	--	19	--	93	--	19	--	9	--
7	--	25	--	152	--	276	--	103	--	236	--
17	--	33	--	2	--	76	--	53	--	6	--
30	--	57	--	14	--	68	--	61	--	9	--
14	--	35	--	7	--	123	--	13	--	3	--
24	--	17	--	5	--	12	--	1	--	1	--
38	--	3	--	96	--	18	--	29	--	7	--
29	--	43	--	97	--	20	--	19	--	149	--
11	--	79	--	138	--	118	--	1	--	1	--
38	--	29	--	3	--	0	--	3	--	14	--
4	--	2	--	2	--	86	--	132	--	3	--
18	--	24	--	36	--	63	--	76	--	0	--
4	--	3	--	0	--	63	--	21	--	0	--
35	--	33	--	15	--	77	--	9	--	1	--
4	--	24	--	2	--	6	--	522	--	1	--
20	--	57	--	28	--	39	--	0	--	1	--
10	--	52	--	2	--	48	--	31	--	1	--
3	--	24	--	45	--	1	--	10	--	0	--
2	--	27	--	7	--	31	--	20	--	165	--
40	--	49	--	1	--	31	--	0	--	2	--
12	--	38	--	7	--	1	--	14	--	6	--
14	--	15	--	13	--	0	--	1	--	172	--
18	--	51	--	4	--	29	--	1	--	1	--
9	--	7	--	2	--	77	--	29	--	0	--
1	--	34	--	1	--	88	--	62	--	0	--
2	--	28	--	9	--	78	--	151	--	1	--
15	--	35	--	58	--	5	--	228	--	1	--
10	--	16	--	6	--	1	--	0	--	2	--
39	--	4	--	6	--	90	--	0	--	7	--
7	--	49	--	41	--	6	--	1	--	8	--
3	--	24	--	0	--	45	--	5	--	5	--
15	--	13	--	377	--	3	--	0	--	1	--
11	--	33	--	57	--	1	--	366	--	76	--
6	--	10	--	113	--	116	--	58	--	2	--
33	--	3	--	3	--	1	--	0	--	12	--
54	--	11	--	43	--	5	--	45	--	0	--
17	--	11	--	43	--	126	--	2	--	141	--
1	--	31	--	0	--	16	--	1	--	8	--
1	--	29	--	27	--	3	--	1	--	2	--
15	--	35	--	106	--	1	--	1	--	3	--
11	--	34	--	7	--	1	--	29	--	1	--
0	--	16	--	224	--	61	--	545	--	20	--
36	--	3	--	113	--	22	--	0	--	15	--
11	--	8	--	0	--	7	--	0	--	1	--
43	--	81	--	161	--	49	--	2	--	116	--
1	--	2	--	1	--	11	--	0	--	428	--
5	--	11	--	53	--	2	--	18	--	2	--
8	--	19	--	72	--	18	--	8	--	3	--
46	--	28	--	6	--	3	--	2	--	5	--
33	--	50	--	116	--	10	--	0	--	150	--
14	--	3	--	1	--	0	--	399	--	6	--
20	--	51	--	92	--	48	--	227	--	1	--
40	--	43	--	95	--	0	--	74	--	0	--
1	--	36	--	109	--	23	--	0	--	1	--
12	--	10	--	13	--	2	--	1	--	13	--
0	--	22	--	1	--	13	--	116	--	0	--
57	--	9	--	10	--	9	--	156	--	1	--
19	--	91	--	0	--	1	--	25	--	182	--
26	--	46	--	4	--	2	--	0	--	39	--
24	--	33	--	1	--	37	--	149	--	0	--
63	--	35	--	15	--	57	--	23	--	3	--
113	--	21	--	1	--	132	--	51	--	15	--
40	--	19	--	13	--	31	--	120	--	6	--
0	--	62	--	36	--	10	--	5	--	0	--
26	--	2	--	34	--	1	--	7	--	0	--
0	--	8	--	27	--	7	--	98	--	6	--
12	--	9	--	1	--	9	--	115	--	240	--
9	--	22	--	4	--	213	--	3	--	0	--
22	--	138	--	37	--	0	--	372	--	487	--
23	--	50	--	1	--	36	--	0	--	2	--
4	--	64	--	7	--	3	--	40	--	0	--
63	--	8	--	47	--	41	--	62	--	6	--
21	--	33	--	52	--	177	--	344	--	265	--
1	--	111	--	1	--	2	--	1	--	1	--
2	--	47	--	2	--	1	--	2	--	3	--
54	--	44	--	38	--	8	--	28	--	0	--
10	--	30	--	1	--	31	--	1	--	195	--
51	--	4	--	1	--	1	--	0	--	0	--
33	--	18	--	4	--	59	--	1	--	115	--
5	--	33	--	6	--	2	--	13	--	34	--
20	--	21	--	104	--	3	--	2	--	176	--
7	--	12	--	11	--	1	--	86	--	138	--
10	--	23	--	68	--	80	--	158	--	0	--
19	--	22	--	16	--	14	--	81	--	0	--
15	--	0	--	5	--	15	--	2	--	424	--
57	--	14	--	1	--	7	--	9	--	1	--
11	--	14	--	21	--	10	--	54	--	6	--
8	--	27	--	82	--	24	--	131	--	9	--
4	--	36	--	2	--	11	--	12	--	0	--
5	--	207	--	2	--	4	--	0	--	482	--
36	--	34	--	8	--	11	--	14	--	3	--
23	--	22	--	83	--	4	--	26	--	11	--
51	--	65	--	0	--	3	--	1	--	74	--
34	--	4	--	71	--	29	--	1	--	1	--
43	--	2	--	2	--	11	--	274	--	228	--
7	--	104	--	1	--	112	--	61	--	1	--
6	--	7	--	68	--	181	--	8	--	20	--
10	--	1	--	0	--	11	--	2	--	10	--
16	--	55	--	15	--	58	--	2	--	288	--
15	--	26	--	1	--	11	--	344	--	235	--
2	--	3	--	76	--	45	--	1	--	74	--
3	--	137	--	56	--	9	--	4	--	5	--
40	--	21	--	26	--	4	--	352	--	6	--
36	--	33	--	194	--	9	--	218	--	199	--
10	--	41	--	46	--	2	--	2	--	152	--
46	--	6	--	5	--	97	--	31	--	1	--
2	--	41	--	142	--	0	--	24	--	146	--
0	--	35	--	0	--	1	--	0	--	7	--
40	--	87	--	3	--	14	--	2	--	80	--
38	--	28	--	6	--	1	--	0	--	373	--
14	--	18	--	12	--	86	--	9	--	8	--
26	--	24	--	4	--	14	--	187	--	721	--
31	--	70	--	5	--	24	--	55	--	0	--
79	--	1	--	85	--	3	--	9	--	8	--
27	--	7	--	7	--	14	--	6	--	8	--
8	--	38	--	16	--	0	--	1	--	587	--
17	--	33	--	1	--	13	--	18	--	15	--
5	--	22	--	136	--	179	--	110	--	190	--
21	--	47	--	1	--	1	--	1	--	29	--
2	--	17	--	8	--	3	--	15	--	64	--
37	--	46	--	76	--	69	--	0	--	68	--
14	--	1	--	5	--	7	--	281	--	6	--
9	--	54	--	23	--	50	--	2	--	1	--
25	--	25	--	10	--	19	--	0	--	5	--
3	--	53	--	72	--	0	--	4	--	200	--
28	--	24	--	5	--	13	--	1	--	11	--
19	--	19	--	2	--	3	--	0	--	3	--
0	--	16	--	30	--	109	--	3	--	111	--
7	--	32	--	127	--	18	--	512	--	7	--
78	--	38	--	92	--	26	--	618	--	120	--
15	--	31	--	0	--	89	--	2	--	1	--
68	--	88	--	1	--	16	--	455	--	9	--
29	--	0	--	16	--	3	--	159	--	6	--
33	--	34	--	61	--	1	--	1	--	55	--
0	--	24	--	40	--	66	--	6	--	1	--
6	--	28	--	66	--	1	--	152	--	19	--
17	--	24	--	18	--	2	--	0	--	0	--
38	--	2	--	6	--	4	--	49	--	2	--
65	--	9	--	27	--	2	--	17	--	3	--
16	--	47	--	90	--	0	--	203	--	62	--
0	--	8	--	87	--	2	--	5	--	71	--
14	--	9	--	137	--	11	--	84	--	5	--
40	--	6	--	83	--	118	--	3	--	18	--
2	--	11	--	8	--	23	--	1	--	3	--
33	--	1	--	149	--	2	--	38	--	40	--
40	--	62	--	9	--	162	--	0	--	2	--
11	--	18	--	55	--	21	--	0	--	2	--
5	--	35	--	118	--	5	--	4	--	316	--
23	--	7	--	90	--	3	--	0	--	385	--
14	--	6	--	31	--	4	--	18	--	8	--
28	--	76	--	36	--	15	--	0	--	4	--
5	--	110	--	123	--	112	--	188	--	145	--
31	--	20	--	6	--	0	--	1	--	78	--
0	--	14	--	7	--	0	--	3	--	3	--
59	--	96	--	34	--	58	--	128	--	0	--
4	--	27	--	0	--	1	--	13	--	0	--
0	--	27	--	13	--	0	--	1	--	190	--
15	--	12	--	66	--	4	--	137	--	1	--
34	--	28	--	0	--	10	--	16	--	4	--
19	--	75	--	3	--	4	--	62	--	1	--
6	--	36	--	97	--	1	--	2	--	34	--
29	--	81	--	1	--	18	--	85	--	23	--
22	--	10	--	1	--	2	--	2	--	27	--
13	--	7	--	3	--	226	--	250	--	26	--
13	--	35	--	23	--	6	--	475	--	12	--
28	--	34	--	0	--	2	--	1	--	3	--
9	--	38	--	1	--	25	--	0	--	79	--
5	--	21	--	0	--	17	--	179	--	0	--
6	--	86	--	75	--	103	--	0	--	138	--
19	--	74	--	26	--	0	--	5	--	12	--
35	--	1	--	0	--	16	--	3	--	0	--
10	--	17	--	9	--	32	--	60	--	140	--
17	--	71	--	17	--	77	--	1	--	7	--
36	--	4	--	12	--	1	--	45	--	4	--
57	--	20	--	0	--	0	--	361	--	632	--
6	--	7	--	5	--	10	--	0	--	2	--
59	--	76	--	5	--	110	--	3	--	441	--
3	--	39	--	3	--	2	--	0	--	3	--
4	--	6	--	37	--	1	--	12	--	257	--
25	--	20	--	12	--	3	--	0	--	1	--
8	--	5	--	77	--	4	--	27	--	257	--
25	--	50	--	12	--	8	--	30	--	0	--
34	--	1	--	6	--	3	--	12	--	6	--
28	--	6	--	41	--	0	--	10	--	99	--
12	--	33	--	5	--	19	--	59	--	2	--
12	--	5	--	1	--	5	--	2	--	0	--
49	--	31	--	76	--	1	--	2	--	0	--
18	--	47	--	12	--	0	--	167	--	23	--
15	--	49	--	16	--	68	--	0	--	0	--
34	--	16	--	11	--	145	--	100	--	0	--
8	--	92	--	3	--	8	--	6	--	3	--
14	--	4	--	75	--	4	--	34	--	1	--
6	--	35	--	38	--	0	--	38	--	9	--
94	--	3	--	60	--	66	--	23	--	5	--
25	--	7	--	16	--	39	--	40	--	3	--
10	--	7	--	0	--	0	--	16	--	2	--
45	--	10	--	36	--	9	--	6	--	203	--
49	--	33	--	5	--	65	--	230	--	421	--
35	--	10	--	69	--	17	--	26	--	1	--
10	--	8	--	0	--	185	--	2	--	4	--
30	--	42	--	2	--	0	--	88	--	32	--
37	--	5	--	30	--	69	--	24	--	3	--
5	--	14	--	5	--	4	--	0	--	9	--
28	--	31	--	2	--	33	--	12	--	59	--
0	--	42	--	140	--	230	--	3	--	2	--
37	--	0	--	1	--	0	--	0	--	0	--
16	--	29	--	230	--	54	--	112	--	13	--
2	--	28	--	54	--	15	--	1	--	7	--
24	--	99	--	32	--	14	--	3	--	0	--
10	--	3	--	14	--	0	--	152	--	101	--
6	--	0	--	14	--	0	--	89	--	9	--
21	--	72	--	1	--	0	--	3	--	4	--
15	--	107	--	185	--	1	--	0	--	35	--
33	--	4	--	51	--	85	--	19	--	507	--
56	--	8	--	33	--	64	--	1	--	307	--
64	--	2	--	1	--	43	--	34	--	1	--
5	--	106	--	9	--	2	--	116	--	3	--
48	--	8	--	16	--	204	--	12	--	2	--
2	--	24	--	21	--	2	--	362	--	32	--
24	--	4	--	63	--	1	--	88	--	4	--
31	--	5	--	6	--	0	--	1	--	2	--
5	--	34	--	121	--	25	--	81	--	414	--
56	--	5	--	43	--	85	--	0	--	46	--
37	--	13	--	9	--	2	--	1	--	304	--
0	--	15	--	17	--	34	--	103	--	2	--
29	--	23	--	8	--	185	--	37	--	5	--
8	--	26	--	11	--	2	--	0	--	1	--
12	--	--	--	55	--	80	--	38	--	4	--
30	--	--	--	5	--	52	--	0	--	5	--
72	--	--	--	13	--	9	--	129	--	285	--
6	--	--	--	0	--	0	--	1	--	21	--
23	--	--	--	5	--	2	--	38	--	59	--
83	--	--	--	6	--	0	--	2	--	4	--
3	--	--	--	46	--	33	--	5	--	48	--
1	--	--	--	68	--	35	--	0	--	3	--
62	--	--	--	63	--	37	--	1	--	3	--
5	--	--	--	6	--	4	--	2	--	398	--
2	--	--	--	64	--	1	--	90	--	190	--
1	--	--	--	113	--	0	--	400	--	91	--
12	--	--	--	71	--	1	--	23	--	2	--
16	--	--	--	20	--	10	--	11	--	319	--
31	--	--	--	50	--	65	--	7	--	4	--
1	--	--	--	31	--	6	--	8	--	0	--
49	--	--	--	33	--	0	--	645	--	189	--
17	--	--	--	16	--	1	--	1	--	256	--
29	--	--	--	6	--	17	--	66	--	1	--
6	--	--	--	2	--	0	--	37	--	49	--
16	--	--	--	1	--	20	--	359	--	21	--
47	--	--	--	81	--	67	--	35	--	1	--
97	--	--	--	1	--	0	--	0	--	0	--
0	--	--	--	2	--	51	--	12	--	0	--
13	--	--	--	13	--	4	--	120	--	3	--
10	--	--	--	2	--	0	--	10	--	10	--
9	--	--	--	5	--	27	--	72	--	91	--
52	--	--	--	57	--	95	--	11	--	67	--
27	--	--	--	116	--	9	--	1	--	39	--
11	--	--	--	9	--	0	--	65	--	214	--
39	--	--	--	68	--	1	--	1	--	3	--
26	--	--	--	13	--	4	--	0	--	0	--
41	--	--	--	4	--	9	--	3	--	6	--
8	--	--	--	2	--	222	--	4	--	0	--
0	--	--	--	22	--	34	--	5	--	175	--
38	--	--	--	8	--	39	--	249	--	62	--
15	--	--	--	2	--	2	--	0	--	13	--
30	--	--	--	77	--	1	--	6	--	6	--
17	--	--	--	3	--	98	--	0	--	0	--
12	--	--	--	73	--	0	--	51	--	37	--
4	--	--	--	70	--	3	--	77	--	13	--
9	--	--	--	2	--	2	--	247	--	115	--
9	--	--	--	46	--	0	--	58	--	0	--
9	--	--	--	98	--	1	--	1	--	4	--
71	--	--	--	1	--	0	--	142	--	9	--
40	--	--	--	128	--	5	--	0	--	2	--
2	--	--	--	64	--	1	--	283	--	1	--
51	--	--	--	4	--	3	--	3	--	4	--
68	--	--	--	11	--	14	--	1	--	2	--
19	--	--	--	2	--	46	--	10	--	60	--
13	--	--	--	2	--	4	--	9	--	2	--
23	--	--	--	93	--	2	--	32	--	4	--
11	--	--	--	17	--	113	--	321	--	2	--
34	--	--	--	20	--	3	--	2	--	12	--
21	--	--	--	1	--	0	--	386	--	13	--
11	--	--	--	0	--	5	--	3	--	6	--
5	--	--	--	3	--	121	--	0	--	52	--
11	--	--	--	0	--	0	--	1	--	242	--
0	--	--	--	15	--	156	--	0	--	137	--
1	--	--	--	20	--	38	--	458	--	3	--
6	--	--	--	91	--	40	--	1	--	1	--
11	--	--	--	22	--	0	--	5	--	5	--
2	--	--	--	0	--	134	--	0	--	1	--
16	--	--	--	3	--	1	--	0	--	479	--
21	--	--	--	53	--	1	--	138	--	5	--
8	--	--	--	12	--	0	--	113	--	2	--
41	--	--	--	1	--	88	--	77	--	5	--
55	--	--	--	3	--	0	--	5	--	59	--
33	--	--	--	73	--	119	--	401	--	20	--
9	--	--	--	52	--	12	--	511	--	0	--
1	--	--	--	6	--	89	--	0	--	16	--
58	--	--	--	5	--	36	--	36	--	142	--
23	--	--	--	244	--	4	--	239	--	110	--
5	--	--	--	1	--	0	--	12	--	8	--
16	--	--	--	4	--	2	--	75	--	2	--
16	--	--	--	151	--	42	--	56	--	2	--
1	--	--	--	214	--	5	--	223	--	414	--
19	--	--	--	3	--	3	--	350	--	2	--
18	--	--	--	21	--	1	--	498	--	2	--
10	--	--	--	30	--	1	--	67	--	154	--
8	--	--	--	2	--	0	--	150	--	13	--
68	--	--	--	11	--	107	--	12	--	173	--
5	--	--	--	3	--	98	--	1	--	6	--
8	--	--	--	7	--	0	--	3	--	7	--
10	--	--	--	20	--	6	--	6	--	570	--
41	--	--	--	0	--	0	--	0	--	128	--
47	--	--	--	2	--	3	--	242	--	2	--
158	--	--	--	49	--	34	--	0	--	6	--
68	--	--	--	116	--	0	--	1	--	204	--
0	--	--	--	2	--	10	--	33	--	2	--
52	--	--	--	2	--	4	--	0	--	6	--
57	--	--	--	52	--	35	--	13	--	8	--
3	--	--	--	2	--	12	--	204	--	10	--
6	--	--	--	0	--	109	--	6	--	14	--
7	--	--	--	89	--	0	--	1	--	0	--
10	--	--	--	5	--	5	--	5	--	131	--
34	--	--	--	15	--	1	--	127	--	151	--
11	--	--	--	15	--	62	--	5	--	29	--
5	--	--	--	5	--	10	--	0	--	1	--
2	--	--	--	1	--	6	--	0	--	0	--
14	--	--	--	5	--	0	--	2	--	13	--
19	--	--	--	67	--	48	--	9	--	66	--
44	--	--	--	6	--	6	--	6	--	13	--
20	--	--	--	72	--	24	--	1	--	632	--
40	--	--	--	124	--	63	--	0	--	16	--
26	--	--	--	1	--	113	--	5	--	2	--
14	--	--	--	44	--	0	--	0	--	3	--
3	--	--	--	16	--	76	--	3	--	1	--
63	--	--	--	17	--	19	--	10	--	2	--
30	--	--	--	78	--	15	--	135	--	1	--
9	--	--	--	93	--	103	--	8	--	2	--
48	--	--	--	2	--	2	--	6	--	1	--
40	--	--	--	0	--	1	--	0	--	1	--
10	--	--	--	19	--	9	--	1	--	1	--
16	--	--	--	12	--	0	--	83	--	208	--
18	--	--	--	148	--	34	--	80	--	47	--
20	--	--	--	2	--	29	--	1	--	199	--
13	--	--	--	85	--	0	--	2	--	1	--
0	--	--	--	7	--	5	--	128	--	3	--
27	--	--	--	57	--	4	--	5	--	52	--
6	--	--	--	6	--	4	--	32	--	207	--
7	--	--	--	11	--	60	--	6	--	5	--
5	--	--	--	2	--	5	--	261	--	38	--
5	--	--	--	1	--	0	--	37	--	25	--
2	--	--	--	28	--	106	--	73	--	108	--
13	--	--	--	20	--	1	--	398	--	1	--
8	--	--	--	279	--	5	--	3	--	618	--
9	--	--	--	66	--	1	--	127	--	0	--
13	--	--	--	65	--	51	--	2	--	75	--
27	--	--	--	11	--	17	--	162	--	246	--
1	--	--	--	29	--	0	--	84	--	40	--
64	--	--	--	14	--	0	--	181	--	36	--
1	--	--	--	7	--	96	--	5	--	14	--
3	--	--	--	29	--	6	--	0	--	13	--
36	--	--	--	0	--	0	--	75	--	730	--
108	--	--	--	2	--	13	--	2	--	5	--
20	--	--	--	54	--	1	--	0	--	0	--
2	--	--	--	0	--	6	--	7	--	1	--
60	--	--	--	21	--	62	--	37	--	7	--
17	--	--	--	2	--	14	--	7	--	45	--
48	--	--	--	5	--	210	--	2	--	401	--
7	--	--	--	4	--	0	--	146	--	1	--
48	--	--	--	4	--	7	--	1	--	21	--
5	--	--	--	17	--	53	--	2	--	212	--
5	--	--	--	38	--	0	--	1	--	487	--
9	--	--	--	25	--	6	--	100	--	21	--
19	--	--	--	70	--	7	--	285	--	99	--
27	--	--	--	96	--	8	--	2	--	30	--
24	--	--	--	76	--	31	--	22	--	118	--
4	--	--	--	48	--	47	--	3	--	2	--
35	--	--	--	28	--	72	--	1	--	0	--
16	--	--	--	3	--	6	--	177	--	33	--
67	--	--	--	79	--	1	--	163	--	9	--
3	--	--	--	99	--	68	--	21	--	71	--
1	--	--	--	0	--	65	--	1	--	14	--
0	--	--	--	0	--	29	--	14	--	7	--
32	--	--	--	47	--	19	--	26	--	33	--
22	--	--	--	3	--	6	--	0	--	2	--
8	--	--	--	89	--	22	--	0	--	6	--
24	--	--	--	7	--	20	--	0	--	168	--
38	--	--	--	2	--	42	--	441	--	175	--
8	--	--	--	8	--	9	--	138	--	0	--
35	--	--	--	7	--	0	--	16	--	0	--
39	--	--	--	5	--	1	--	102	--	2	--
80	--	--	--	9	--	74	--	23	--	9	--
17	--	--	--	148	--	4	--	283	--	441	--
5	--	--	--	102	--	1	--	3	--	4	--
19	--	--	--	12	--	0	--	2	--	60	--
15	--	--	--	29	--	0	--	1	--	18	--
0	--	--	--	179	--	42	--	92	--	11	--
11	--	--	--	103	--	68	--	140	--	134	--
52	--	--	--	89	--	3	--	313	--	195	--
8	--	--	--	13	--	4	--	5	--	568	--
4	--	--	--	6	--	213	--	126	--	61	--
11	--	--	--	98	--	1	--	18	--	1	--
23	--	--	--	2	--	13	--	57	--	353	--
11	--	--	--	9	--	2	--	0	--	144	--
26	--	--	--	109	--	2	--	0	--	68	--
12	--	--	--	13	--	34	--	38	--	220	--
5	--	--	--	1	--	15	--	30	--	273	--
144	--	--	--	41	--	12	--	198	--	29	--
39	--	--	--	44	--	97	--	1	--	341	--
11	--	--	--	1	--	95	--	21	--	331	--
16	--	--	--	2	--	221	--	2	--	97	--
32	--	--	--	13	--	4	--	0	--	133	--
4	--	--	--	4	--	13	--	405	--	164	--
3	--	--	--	1	--	2	--	175	--	190	--
18	--	--	--	0	--	34	--	8	--	296	--
35	--	--	--	1	--	47	--	180	--	415	--
17	--	--	--	1	--	4	--	108	--	368	--
8	--	--	--	12	--			81	--	183	--
37	--	--	--	1	--			92	--	272	--
14	--	--	--					171	--	1	--
6	--	--	--					597	--	33	--
14	--	--	--					1	--	94	--
9	--	--	--					15	--	19	--
14	--	--	--					46	--	10	--
2	--	--	--					215	--	--	--
2	--	--	--					3	--	--	--
39	--	--	--					7	--	--	--
14	--	--	--					231	--	--	--
44	--	--	--					14	--	--	--
11	--	--	--					460	--	--	--
17	--	--	--					1	--	--	--
9	--	--	--					268	--	--	--
41	--	--	--					86	--	--	--
11	--	--	--					140	--	--	--
11	--	--	--					7	--	--	--
20	--	--	--					0	--	--	--
13	--	--	--					0	--	--	--
12	--	--	--					97	--	--	--
3	--	--	--					0	--	--	--
13	--	--	--					90	--	--	--
49	--	--	--					8	--	--	--
16	--	--	--					235	--	--	--
34	--	--	--					0	--	--	--
76	--	--	--					162	--	--	--
18	--	--	--					3	--	--	--
57	--	--	--					4	--	--	--
22	--	--	--					0	--	--	--
1	--	--	--					14	--	--	--
3	--	--	--					62	--	--	--
3	--	--	--					6	--	--	--
1	--	--	--					0	--	--	--
30	--	--	--					194	--	--	--
30	--	--	--					54	--	--	--
34	--	--	--					63	--	--	--
47	--	--	--					80	--	--	--
26	--	--	--					187	--	--	--
33	--	--	--					232	--	--	--
17	--	--	--					368	--	--	--
46	--	--	--					43	--	--	--
3	--	--	--					11	--	--	--
17	--	--	--					3	--	--	--
39	--	--	--					15	--	--	--
5	--	--	--					4	--	--	--
5	--	--	--					6	--	--	--
22	--	--	--					0	--	--	--
6	--	--	--					5	--	--	--
19	--	--	--					221	--	--	--
2	--	--	--					189	--	--	--
13	--	--	--					3	--	--	--
18	--	--	--					2	--	--	--
15	--	--	--					4	--	--	--
0	--	--	--					8	--	--	--
37	--	--	--					62	--	--	--
88	--	--	--					185	--	--	--
6	--	--	--					4	--	--	--
18	--	--	--					1	--	--	--
10	--	--	--					2	--	--	--
69	--	--	--					11	--	--	--
23	--	--	--					122	--	--	--
4	--	--	--					1	--	--	--
50	--	--	--					608	--	--	--
12	--	--	--					12	--	--	--
20	--	--	--					0	--	--	--
5	--	--	--					25	--	--	--
39	--	--	--					58	--	--	--
13	--	--	--					16	--	--	--
9	--	--	--					770	--	--	--
5	--	--	--					0	--	--	--
36	--	--	--					17	--	--	--
3	--	--	--					201	--	--	--
17	--	--	--					119	--	--	--
6	--	--	--					1	--	--	--
4	--	--	--					0	--	--	--
5	--	--	--					0	--	--	--
92	--	--	--					130	--	--	--
57	--	--	--					88	--	--	--
9	--	--	--					11	--	--	--
4	--	--	--					6	--	--	--
62	--	--	--					267	--	--	--
20	--	--	--					4	--	--	--
7	--	--	--					14	--	--	--
4	--	--	--					160	--	--	--
163	--	--	--					402	--	--	--
4	--	--	--					360	--	--	--
11	--	--	--					297	--	--	--
7	--	--	--					808	--	--	--
33	--	--	--					0	--	--	--
14	--	--	--					0	--	--	--
4	--	--	--					397	--	--	--
95	--	--	--					274	--	--	--
5	--	--	--					0	--	--	--
11	--	--	--					296	--	--	--
5	--	--	--					100	--	--	--
27	--	--	--					115	--	--	--
60	--	--	--					1	--	--	--
14	--	--	--					1	--	--	--
52	--	--	--					2	--	--	--
5	--	--	--					32	--	--	--
2	--	--	--					4	--	--	--
8	--	--	--					456	--	--	--
3	--	--	--					13	--	--	--
18	--	--	--					0	--	--	--
5	--	--	--					61	--	--	--
16	--	--	--					73	--	--	--
7	--	--	--					1	--	--	--
3	--	--	--					33	--	--	--
16	--	--	--					83	--	--	--
20	--	--	--					18	--	--	--
2	--	--	--					18	--	--	--
0	--	--	--					11	--	--	--
15	--	--	--					25	--	--	--
34	--	--	--					0	--	--	--
49	--	--	--					1	--	--	--
53	--	--	--					6	--	--	--
85	--	--	--					33	--	--	--
26	--	--	--					0	--	--	--
32	--	--	--					251	--	--	--
29	--	--	--					1	--	--	--
23	--	--	--					27	--	--	--
5	--	--	--					1	--	--	--
27	--	--	--					374	--	--	--
22	--	--	--					3	--	--	--
4	--	--	--					3	--	--	--
2	--	--	--					400	--	--	--
36	--	--	--					1	--	--	--
12	--	--	--					3	--	--	--
8	--	--	--					2	--	--	--
25	--	--	--					4	--	--	--
46	--	--	--					7	--	--	--
32	--	--	--					276	--	--	--
55	--	--	--					2	--	--	--
23	--	--	--					0	--	--	--
19	--	--	--					4	--	--	--
3	--	--	--					162	--	--	--
29	--	--	--					0	--	--	--
27	--	--	--					3	--	--	--
15	--	--	--					7	--	--	--
14	--	--	--					2	--	--	--
43	--	--	--					81	--	--	--
44	--	--	--					0	--	--	--
3	--	--	--					1	--	--	--
40	--	--	--					5	--	--	--
10	--	--	--					669	--	--	--
31	--	--	--					52	--	--	--
15	--	--	--					84	--	--	--
7	--	--	--					0	--	--	--
43	--	--	--					0	--	--	--
20	--	--	--					179	--	--	--
27	--	--	--					3	--	--	--
26	--	--	--					9	--	--	--
3	--	--	--					330	--	--	--
19	--	--	--					57	--	--	--
22	--	--	--					193	--	--	--
33	--	--	--					110	--	--	--
30	--	--	--					52	--	--	--
6	--	--	--					9	--	--	--
52	--	--	--					0	--	--	--
25	--	--	--					94	--	--	--
39	--	--	--					24	--	--	--
12	--	--	--					22	--	--	--
1	--	--	--					36	--	--	--
23	--	--	--					238	--	--	--
42	--	--	--					2	--	--	--
46	--	--	--					259	--	--	--
8	--	--	--					0	--	--	--
74	--	--	--					103	--	--	--
33	--	--	--					6	--	--	--
25	--	--	--					4	--	--	--
16	--	--	--					181	--	--	--
41	--	--	--					5	--	--	--
39	--	--	--					4	--	--	--
28	--	--	--					188	--	--	--
20	--	--	--					6	--	--	--
1	--	--	--					110	--	--	--
15	--	--	--					203	--	--	--
7	--	--	--					2	--	--	--
5	--	--	--					366	--	--	--
5	--	--	--					8	--	--	--
17	--	--	--					7	--	--	--
19	--	--	--					1	--	--	--
7	--	--	--					22	--	--	--
12	--	--	--					2	--	--	--
56	--	--	--					263	--	--	--
29	--	--	--					103	--	--	--
27	--	--	--					114	--	--	--
51	--	--	--					290	--	--	--
5	--	--	--					--	--	--	--
19	--	--	--					--	--	--	--
7	--	--	--					--	--	--	--
38	--	--	--					--	--	--	--
41	--	--	--					--	--	--	--
6	--	--	--					--	--	--	--
53	--	--	--					--	--	--	--
1	--	--	--					--	--	--	--
10	--	--	--					--	--	--	--
3	--	--	--					--	--	--	--
21	--	--	--					--	--	--	--
16	--	--	--					--	--	--	--
31	--	--	--					--	--	--	--
76	--	--	--					--	--	--	--
5	--	--	--					--	--	--	--
25	--	--	--					--	--	--	--
31	--	--	--					--	--	--	--
47	--	--	--					--	--	--	--
0	--	--	--					--	--	--	--
9	--	--	--					--	--	--	--
31	--	--	--					--	--	--	--
88	--	--	--					--	--	--	--
19	--	--	--					--	--	--	--
45	--	--	--					--	--	--	--
6	--	--	--					--	--	--	--
11	--	--	--					--	--	--	--
6	--	--	--					--	--	--	--
6	--	--	--					--	--	--	--
17	--	--	--					--	--	--	--
31	--	--	--					--	--	--	--
13	--	--	--					--	--	--	--
17	--	--	--					--	--	--	--
3	--	--	--					--	--	--	--
2	--	--	--					--	--	--	--
57	--	--	--					--	--	--	--
26	--	--	--					--	--	--	--
2	--	--	--					--	--	--	--
62	--	--	--					--	--	--	--
7	--	--	--					--	--	--	--
62	--	--	--					--	--	--	--
11	--	--	--					--	--	--	--
9	--	--	--					--	--	--	--
26	--	--	--					--	--	--	--
21	--	--	--					--	--	--	--
9	--	--	--					--	--	--	--
13	--	--	--					--	--	--	--
7	--	--	--					--	--	--	--
5	--	--	--					--	--	--	--
9	--	--	--					--	--	--	--
125	--	--	--					--	--	--	--
23	--	--	--					--	--	--	--
9	--	--	--					--	--	--	--
13	--	--	--					--	--	--	--
15	--	--	--					--	--	--	--
18	--	--	--					--	--	--	--
24	--	--	--					--	--	--	--
7	--	--	--					--	--	--	--
2	--	--	--					--	--	--	--
15	--	--	--					--	--	--	--
16	--	--	--					--	--	--	--
11	--	--	--					--	--	--	--
4	--	--	--					--	--	--	--
9	--	--	--					--	--	--	--
19	--	--	--					--	--	--	--
13	--	--	--					--	--	--	--
48	--	--	--					--	--	--	--
15	--	--	--					--	--	--	--
5	--	--	--					--	--	--	--
21	--	--	--					--	--	--	--
2	--	--	--					--	--	--	--
10	--	--	--					--	--	--	--
12	--	--	--					--	--	--	--
44	--	--	--					--	--	--	--
13	--	--	--					--	--	--	--
2	--	--	--					--	--	--	--
19	--	--	--					--	--	--	--
38	--	--	--					--	--	--	--
27	--	--	--					--	--	--	--
34	--	--	--					--	--	--	--
21	--	--	--					--	--	--	--
4	--	--	--					--	--	--	--
17	--	--	--					--	--	--	--
1	--	--	--					--	--	--	--
37	--	--	--					--	--	--	--
10	--	--	--					--	--	--	--
66	--	--	--					--	--	--	--
7	--	--	--					--	--	--	--
6	--	--	--					--	--	--	--
7	--	--	--					--	--	--	--
6	--	--	--					--	--	--	--
7	--	--	--					--	--	--	--
9	--	--	--					--	--	--	--
25	--	--	--					--	--	--	--
45	--	--	--					--	--	--	--
38	--	--	--					--	--	--	--
8	--	--	--					--	--	--	--
1	--	--	--					--	--	--	--
11	--	--	--					--	--	--	--
0	--	--	--					--	--	--	--
13	--	--	--					--	--	--	--
21	--	--	--					--	--	--	--
0	--	--	--					--	--	--	--
33	--	--	--					--	--	--	--
15	--	--	--					--	--	--	--
80	--	--	--					--	--	--	--
21	--	--	--					--	--	--	--
26	--	--	--					--	--	--	--
0	--	--	--					--	--	--	--
5	--	--	--					--	--	--	--
36	--	--	--					--	--	--	--
9	--	--	--					--	--	--	--
12	--	--	--					--	--	--	--
6	--	--	--					--	--	--	--
23	--	--	--					--	--	--	--
23	--	--	--					--	--	--	--
0	--	--	--					--	--	--	--
77	--	--	--					--	--	--	--
36	--	--	--					--	--	--	--
3	--	--	--					--	--	--	--
29	--	--	--					--	--	--	--
0	--	--	--					--	--	--	--
38	--	--	--					--	--	--	--
23	--	--	--					--	--	--	--
0	--	--	--					--	--	--	--
51	--	--	--					--	--	--	--
9	--	--	--					--	--	--	--
4	--	--	--					--	--	--	--
10	--	--	--					--	--	--	--
43	--	--	--					--	--	--	--
9	--	--	--					--	--	--	--
38	--	--	--					--	--	--	--
3	--	--	--					--	--	--	--
10	--	--	--					--	--	--	--
20	--	--	--					--	--	--	--
37	--	--	--					--	--	--	--
5	--	--	--					--	--	--	--
20	--	--	--					--	--	--	--
37	--	--	--					--	--	--	--
10	--	--	--					--	--	--	--
15	--	--	--					--	--	--	--
49	--	--	--					--	--	--	--
15	--	--	--					--	--	--	--
2	--	--	--					--	--	--	--
1	--	--	--					--	--	--	--
9	--	--	--					--	--	--	--
7	--	--	--					--	--	--	--
3	--	--	--					--	--	--	--
1	--	--	--					--	--	--	--
2	--	--	--					--	--	--	--
3	--	--	--					--	--	--	--
17	--	--	--					--	--	--	--
39	--	--	--					--	--	--	--
18	--	--	--					--	--	--	--
21	--	--	--					--	--	--	--
0	--	--	--					--	--	--	--
28	--	--	--					--	--	--	--
38	--	--	--					--	--	--	--
11	--	--	--					--	--	--	--
3	--	--	--					--	--	--	--
45	--	--	--					--	--	--	--
19	--	--	--					--	--	--	--
4	--	--	--					--	--	--	--
117	--	--	--					--	--	--	--
5	--	--	--					--	--	--	--
16	--	--	--					--	--	--	--
68	--	--	--					--	--	--	--
13	--	--	--					--	--	--	--
67	--	--	--					--	--	--	--
13	--	--	--					--	--	--	--
23	--	--	--					--	--	--	--
8	--	--	--					--	--	--	--
46	--	--	--					--	--	--	--
9	--	--	--					--	--	--	--
3	--	--	--					--	--	--	--

## Sheet: Positive cells per mouse
TRPM3				TRPA1				TRPV1
Contralateral		Ipsilateral		Contralateral		Ipsilateral		Contralateral		Ipsilateral
WGA-	WGA+	WGA-	WGA+	WGA-	WGA+	WGA-	WGA+	WGA-	WGA+	WGA-	WGA+
0.81008	0.85714	0.86957	1	0.55556	0.51852	0.57143	0.78889	0.61465	0.66667	0.60241	0.69697
0.76442	0.71429	0.83051	1	0.70357	0.54545	0.64062	0.77778	0.6165	0.5	0.46429	0.75
0.77895	0.6	0.67143	0.86667	0.73913	0.5	0.56089	0.58333	0.57018	0.5	0.47122	0.33333
0.82973	0.875	0.77778	1	0.67411	0.71429	0.72038	0.5	0.44643	0.42857	0.59375	0.55556
0.8062	0.66667	0.84615	1	0.53922	0.54545	0.53012	0.38571	0.69912	0.41176	0.58599	0.67568
0.7929	0.6875	0.86982	1	0.6112	0.57823	0.71429	0.45455	0.51587	0.47368	0.56667	0.63636
