# Supplementary material for: Upregulation of TRPM3 in nociceptors innervating inflamed tissue
Source: eLife. 2020 Sep 3;9:e61103. doi: 10.7554/eLife.61103 (PMC7470828; doi:10.7554/eLife.61103)
Supplement: Figure 2—source data 1. [file elife-61103-fig2-data1.xlsx]

## Sheet: Norm GCaMP3 amplitudes per cell
TRPM3								TRPA1								TRPV1
Control				Isosakuranetin				Control				Isosakuranetin				Control				Isosakuranetin
Contralateral		Ipsilateral		Contralateral		Ipsilateral		Contralateral		Ipsilateral		Contralateral		Ipsilateral		Contralateral		Ipsilateral		Contralateral		Ipsilateral
WGA-	WGA+	WGA-	WGA+	WGA-	WGA+	WGA-	WGA+	WGA-	WGA+	WGA-	WGA+	WGA-	WGA+	WGA-	WGA+	WGA-	WGA+	WGA-	WGA+	WGA-	WGA+	WGA-	WGA+
0.01495	0.00656	0.04612	0.01532	0.02356	0.00219	0.01443	0.02461	-0.00143	0.0144	0.5972	0.12547	0.03733	0.0114	0.06839	0.05565	0.03191	0.32011	1.09289	1.14517	0.11352	0.04942	0.03915	0.72988
0.02282	-0.00297	0.02907	0.11069	0.03422	0.01172	0.00614	0.01258	0.06981	0.03044	0.0663	0.05555	0.01511	0.03301	0.04699	0.00236	0.94741	0.52028	0.45945	0.8137	0.04657	0.16785	0.57111	0.0242
0.00986	0.28183	0.05522	0.07482	0.01279	0.03762	0.02591	0.01281	0.01867	0.21756	0.08098	0.05464	0.06095	0.11611	0.04408	0.06261	0.06662	0.06514	0.7089	0.06454	0.02761	0.06659	0.32111	0.28896
0.01568	0.01735	0.02124	0.04064	0.03299	0.01244	0.2249	0.03534	0.03158	-0.01721	0.05285	0.08524	0.01467	0.01793	0.088	0.01562	0.04949	0.02331	0.02448	1.35964	0.07634	0.05216	0.47643	1.01004
0.04244	0.01879	0.02	0.22097	0.05541	0.00829	0.03028	0.0294	0.01703	0.04391	0.08975	0.01781	0.05033	-0.01049	0.05779	0.03249	0.17309	0.04699	1.04287	0.51465	0.09113	0.02951	0.09579	-0.00206
0.01548	0.00539	0.02642	0.10967	0.03495	0.01545	0.06463	0.02744	0.03645	0.01009	0.05977	0.036	0.01528	0.04579	0.08345	0.07355	0.52526	0.12305	0.17417	0.21906	0.05717	0.0127	0.48868	0.09161
0.02363	0.0156	0.02488	0.90807	0.01437	0.06556	0.0175	0.02523	0.06533	-0.000860884	0.09062	0.10349	0.06908	0.05825	0.02238	0.14132	0.10193	0.0796	0.11552	1.09932	0.10894	0.09265	0.03259	0.1636
0.00953	0.00721	0.02499	0.1193	0.09627	0.01088	0.05152	0.01041	-0.01673	-0.01003	0.10617	0.04406	0.02595	0.0258	0.04016	0.03492	0.14355	0.02894	0.14877	0.6605	0.06974	0.36007	0.86476	0.01473
0.03566	0.13063	0.04764	0.31437	0.05843	0.05082	0.01099	-0.01209	0.0339	0.01848	0.04279	0.08103	0.03875	0.06301	0.05222	0.05801	0.02558	0.02177	0.03753	0.62825	0.04742	0.24415	0.50716	0.4666
0.01084	0.01468	0.03916	0.41121	0.02022	0.07179	0.0012	0.04019	0.00315	0.05721	0.03011	0.05882	0.01155	0.25265	0.00491	0.10689	0.02343	0.73112	0.01688	0.10744	0.48254	0.26873	0.00345	0.59991
0.00227	0.0702	0.01021	0.51731	0.05092	0.0068	0.01989	0.01643	0.05785	0.05207	0.0553	0.02383	0.0295	-0.0142	0.04256	0.0301	0.00995	0.03129	0.02124	0.07107	0.13126	0.04639	0.50358	0.00384
0.00645	0.01826	0.0307	0.53292	0.02678	0.01152	0.03957	0.00987	0.0123	0.09367	0.02863	0.05286	0.09547	0.01918	0.08455	0.04532	0.03187	0.41743	0.43453	0.57932	0.5059	0.07524	0.1233	0.27934
0.01173	0.11074	0.01689	0.19206	0.08593	0.02464	0.03727	0.0359	0.02751	0.05533	0.03322	0.09718	0.04794	0.14099	0.10376	0.04953	0.0217	0.12426	0.02268	0.35703	0.01309	-0.00282	0.09824	0.13027
0.0118	0.01387	0.02916	0.51951	0.05203	0.0532	0.05492	0.01579	0.02932	0.01726	0.10418	0.09533	0.02624	0.05181	0.06212	0.03115	0.0409	0.01789	0.73555	0.78255	0.0931	0.19387	0.09121	0.07236
0.03881	0.04484	0.02882	0.53295	0.04652	0.02323	0.00475	0.02924	0.0235	0.02564	0.09506	0.49896	0.03634	-0.02356	0.01328	0.04158	0.01936	0.03986	0.14219	0.70724	0.03719	0.09895	0.05665	0.08497
0.0475	0.01953	0.03862	0.30249	0.02013	0.02166	0.06356	0.02761	0.03461	0.05099	0.03961	0.05115	0.06323	0.08072	0.04276	0.0879	0.12266	0.35654	0.68328	0.514	0.05338	0.2292	0.03408	0.77149
0.01309	0.2141	0.02489	0.31486	0.03346	0.02505	0.02048	0.02078	0.05497	0.06387	0.05152	0.04711	0.06408	0.06899	0.03829	0.018	0.59555	0.00981	0.01862	0.05074	0.09724	0.40499	0.04941	0.30889
0.05013	0.02004	0.02601	0.4033	0.02311	0.01569	0.02434	0.01813	0.04979	0.0384	0.06394	0.04242	0.07409	0.07577	0.07995	0.04088	0.00806	0.09464	0.37738	0.69299	0.04417	0.19183	0.7165	0.02674
0.0066	0.00636	0.03442	0.4025	0.10117	0.04704	0.03127	0.00524	0.01499	0.00911	1.24047	0.03486	0.06216	0.01215	0.04639	0.02894	0.08225	0.02631	1.42614	0.4911	-0.00132	0.467	0.01745	0.01997
0.00806	0.06744	0.03414	1.05278	0.05985	0.0888	0.03645	0.01696	0.02026	0.17735	0.03902	0.09464	0.08334	0.15503	0.08354	0.06548	0.51544	0.20923	0.94646	1.13077	0.14539	0.13766	0.42085	0.19551
0.01726	0.01241	0.02626	0.27828	0.16251	0.02163	0.04337	0.01873	0.01074	0.04144	0.06654	0.01875	0.53742	0.08387	0.02831	0.01129	0.02113	0.02412	0.11546	0.28641	0.93223	0.12042	-0.00979	0.15
0.02993	0.00331	0.04626	0.78968	0.03109	0.01203	0.05059	0.01586	0.03281	-0.00254	0.09544	0.39973	0.01508	-0.02932	0.13404	0.09122	0.05715	0.03695	0.14841	0.73101	0.03263	0.08701	0.97914	0.19632
0.22685	0.01831	0.06523	0.25351	0.077	0.18286	0.03578	0.00988	0.12318	0.04924	0.04646	0.05958	0.05062	0.28825	0.03854	0.01872	0.5531	0.80121	0.04376	0.24954	-0.00352	0.159	0.03216	0.02166
0.05622	0.01644	0.02766	0.15717	0.04056	0.04775	0.05802	0.01006	0.04398	0.04777	0.06434	0.01359	0.02811	0.03799	0.05285	0.01357	0.01862	0.07184	0.14551	0.01559	0.05012	0.05137	0.34592	0.0178
0.05723	0.01265	0.03848	0.01447	0.07774	0.03595	0.02744	0.01072	0.05513	0.02862	0.10446	0.06967	0.05145	0.01413	0.07542	0.06465	0.65095	0.09113	0.50432	0.59959	0.02215	0.26168	0.53728	0.42835
0.00487	0.02974	0.01672	0.01561	0.04552	0.03611	0.02965	0.04183	0.01235	0.17147	0.05371	0.07737	0.10594	0.04502	0.05465	0.11177	0.07168	0.21718	0.84788	0.71369	0.05844	0.07046	0.73845	0.67777
0.0106	0.00612	0.03298	0.12853	0.04716	0.29821	0.08657	0.04474	0.01256	0.01301	0.08607	0.08033	0.05058	0.08852	0.07528	0.08515	0.09133	0.15406	0.31052	0.14113	0.02822	0.39042	0.05316	0.14742
0.02005	0.00484	0.04411	0.01614	0.05397	0.07744	0.0279	0.01305	0.02438	0.00873	0.135	0.02961	0.06035	0.15776	0.06199	0.02988	0.24261	0.27933	2.15031	0.42178	0.05625	0.63797	0.84211	0.46684
0.1613	0.00645	0.03165	0.08372	0.05795	0.02763	0.02394	0.02043	0.07683	0.0123	0.04213	0.16848	0.0529	0.04454	0.0666	0.01291	0.23519	0.03187	0.11426	1.2172	0.03997	0.0569	0.18359	0.31605
0.0051	0.00528	0.02895	0.22702	0.03552	0.03421	0.0263	0.01545	0.01806	0.00824	0.07622	-0.01423	0.02224	0.12019	0.04653	0.00899	0.03197	0.04001	0.05616	0.0257	0.5972	0.18524	0.09839	0.02083
0.01938	0.00232	0.04729	0.04696	0.01264	0.12642	-0.00235	0.02946	0.04117	0.05654	0.03628	0.08036	0.05156	0.1602	0.01344	0.09834	0.03028	0.57008	0.09407	1.40941	0.23657	0.1287	-0.00518	0.00983
0.00669	0.01063	0.02823	0.01572	0.10362	0.01352	0.02221	0.03533	0.00959	0.02515	0.03721	0.02221	0.02431	-0.01761	0.04033	0.10623	0.08201	0.52912	0.06136	0.08779	0.4851	0.07571	0.35489	1.59829
0.02652	0.01292	0.05843	0.01121	0.00736	0.11011	0.02631	0.0284	0.04907	-0.02143	0.11989	0.04845	0.04443	0.1826	0.04169	0.08272	0.09858	0.03801	0.10442	0.45169	0.02199	0.31666	0.16109	0.25012
0.14778	0.17724	0.02969	0.03304	0.03183	0.0386	0.01693	0.03935	0.34499	0.11077	0.02072	0.09668	0.02032	0.02241	0.04925	0.04366	1.40795	0.96359	0.5308	1.06416	0.05723	0.74001	0.03856	0.04905
0.16034	0.20195	0.03807	0.02793	0.06417	0.03469	0.05422	0.00558	0.03369	0.15048	0.1227	0.08218	0.06385	0.06977	0.03594	0.02911	0.02702	0.04749	1.44617	0.07119	-0.01103	0.08259	0.00994	0.02285
0.00926	0.04385	0.02404	0.05848	0.06167	0.02805	0.06695	0.01882	0.0112	0.04257	0.05839	0.04202	0.15096	0.09078	0.03386	-0.01266	0.01348	0.04485	0.11965	0.27594	0.20234	0.04375	0.01844	0.1308
0.06171	0.01322	0.01786	0.00613	0.0868	0.02466	0.02752	0.02369	0.05859	0.0634	0.10536	0.08054	0.18228	0.04223	0.06541	0.01253	0.00974	0.52227	0.12489	0.19658	0.27918	0.21466	0.08578	0.38383
0.12738	0.008	0.02245	0.61342	0.24427	0.02881	0.03139	0.03038	0.07621	0.07427	0.00614	0.24492	0.01666	0.05261	0.05441	0.02814	0.02426	0.77726	0.06664	0.93759	0.39544	0.15046	0.53031	0.00932
0.12136	0.02275	0.03201	0.46792	0.03493	0.01194	0.01382	0.0117	0.06163	0.09489	0.08062	0.19803	0.0304	0.01944	0.02934	0.03671	0.04608	0.71223	1.16369	0.01787	0.64201	0.14336	0.0747	0.06789
0.04006	0.00788	0.00465	0.06809	0.04149	0.05436	0.0314	0.00619	0.03779	0.03308	0.04691	0.08919	0.07484	0.15343	0.0811	0.03264	0.80854	0.64447	0.02805	0.39364	0.01673	0.34808	0.02805	0.0272
0.01694	0.012	0.02969	-0.00703	0.02491		0.04451	0.0157	0.01693	-0.00373	0.1253	0.03076	0.02151		0.04485	0.0142	0.25452	0.02744	0.02102	0.09426	0.00654		0.2405	0.08511
0.00788	0.04033	0.02605	0.76369	0.02642		0.00369	0.0154	0.01532	0.03164	0.06079	0.20409	0.01365		0.01417	0.02441	0.32667	0.0268	0.66485	0.89985	0.02369		0.01232	0.02914
0.02495	0.0069	0.02962	0.01161	0.03505		0.02524	0.00216	0.03802	0.01206	0.02185	0.05312	0.03799		0.09326	0.07412	0.00274	0.50705	0.06582	0.08614	0.04197		0.17805	0.02323
0.00755	0.1692	0.02126	1.07718	0.03204		0.02164	0.02927	0.03682	0.34414	0.04049	0.15395	0.02199		0.03782	0.02006	0.29138	0.03991	0.04864	1.07247	0.05622		0.32014	0.47214
0.02426	0.01719	0.0584	1.39514	0.2631		0.04872	0.03365	0.13409	0.0363	0.04023	0.12063	0.10176		0.0338	0.06407	0.00444	0.00613	0.04458	0.99635	0.67529		0.14279	0.93292
0.0554	-0.03374	0.04367	0.64782	0.03676		0.02972	0.00776	0.06562	0.01709	0.03696	0.07011	0.01468		0.04396	0.02835	0.01045	0.20501	0.24053	0.98235	0.10654		0.36084	0.02743
0.05374	0.04086	0.09698	0.02883	0.31677		0.05613	0.05165	0.053	0.01195	0.11905	0.90201	0.7357		0.01679	0.02731	0.07342	0.37291	0.48765	0.70398	0.69991		0.03788	0.00118
0.00642	0.00861	0.03519	0.03723	0.03656		0.02557	0.02242	0.03036	-0.00452	0.09881	0.13587	0.02165		0.07909	0.0414	0.40851	0.1469	0.95022	0.68886	0.73719		0.04166	0.65372
0.01127	0.01475	0.02113	0.01439	0.03602		0.0332	0.028	0.01703	0.03643	0.05529	0.09132	0.0174		0.03061	0.05924	0.07153	0.04269	0.14854	1.1034	0.03957		-0.000396876	0.1635
0.0194	0.03783	0.02909	0.02248	0.03102		0.0115	0.02649	0.00845	0.03303	0.11018	0.07207	0.02239		0.04599	0.01532	0.19863	0.29795	0.56571	0.49131	0.0386		0.26167	0.78142
0.01646	0.01211	0.03837	0.02198	0.02354		0.04187	0.02862	0.01553	0.02884	0.02933	0.09461	0.08472		0.04451	0.04582	0.05627	0.28406	0.02463	1.12388	0.0804		0.01238	0.32099
0.01658	0.03599	0.03093	0.01598	0.02118		0.01389	0.01558	0.02246	0.03883	0.07196	0.06097	0.07633		0.08077	0.01643	0.48353	0.03513	1.31003	0.66711	0.3332		0.16718	0.4321
0.0584	0.0275	0.03946	0.52432	0.06721		0.00274	0.01667	0.07624	0.03362	0.06581	0.31046	0.10517		0.04846	0.00931	0.22358	0.02337	0.6714	0.78747	0.03968		0.00878	0.05681
0.00396	0.01301	0.02962	0.01175	0.07749		0.03825	0.02909	0.07842	0.0101	0.02573	0.02848	0.22223		0.39931	0.04892	0.01774	0.5268	0.01421	0.09804	0.86691		0.14291	0.38165
0.03399	0.39546	0.000588376	0.02133	0.04591		0.02485	0.01961	0.0364	0.03614	0.00138	0.05421	0.0939		0.03934	0.0665	0.0227	0.06448	0.00266	0.05918	0.04878		0.09295	0.02874
0.04312	0.01473	0.02781	0.03532	0.06544		0.1433		0.02337	0.01136	0.06949	0.05218	0.09701		0.16623		0.02496	0.04807	0.4229	0.97066	0.06117		0.00909
0.02875	0.01411	0.06024	0.52179	0.05976		0.01325		-0.0082	0.02642	0.12405	0.03837	0.0151		0.02743		0.14146	0.12019	0.1636	0.03657	0.33075		0.08095
0.08169	0.01842	0.05679	0.43807	0.07039		0.03105		0.03623	0.02475	0.0326	0.05676	0.03294		0.0575		0.0387	0.25403	0.11396	0.80745	0.06408		0.47796
0.0543	0.02628	0.02278	0.01086	0.02041		0.01584		0.03197	0.02698	0.06838	0.07897	0.06565		0.02525		0.69584	0.0232	0.04507	0.01684	0.72277		0.10143
0.01064	0.02885	0.02755	1.14116	0.00277		0.03904		0.01054	0.03759	0.05475	0.98579	0.00181		0.03658		0.09953	0.00187	0.01601	1.04355	0.02249		0.00561
0.05431	0.00955	0.02916	0.01794	0.06751		0.02282		0.05589	0.09309	0.07157	0.01891	0.11702		0.03986		0.46506	0.71793	1.05209	0.13944	0.14085		0.01237
0.05882	0.08911	0.02307	0.01608	0.09969		0.03679		-0.13857	0.03251	0.07055	0.03641	0.13904		0.08012		0.28549	0.29308	1.09518	0.01831	0.36486		0.73992
0.1019	0.03958	0.03744		0.12437		0.03307		0.02617	0.04179	0.0858		0.14843		0.08402		0.01874	0.97071	0.11033		1.34722		0.38812
0.00918	0.08318	0.0227		0.03629		0.02629		0.01086	0.05761	0.05798		0.01275		0.07252		0.10205	0.20676	0.42085		0.27977		0.33437
0.01956	0.03537	0.02933		0.01171		0.00357		0.05006	0.04641	0.07304		0.02064		0.0225		0.17124	0.10729	1.02527		0.05969		0.01513
0.03383	0.06266	0.04145		0.02875		0.02073		0.17619	0.03561	0.19121		0.10544		0.02767		0.00132	0.06666	0.16045		0.1924		0.02361
0.10766	0.08696	0.02629		0.03586		0.05139		0.09663	0.0905	0.07627		0.01329		0.12012		0.4857	0.17115	0.59287		0.09783		0.78186
0.00652	0.01151	0.02042		0.08699		0.0189		0.01484	0.01402	0.0485		0.05839		0.03345		0.19562	0.18302	0.12356		0.06712		-0.00871
0.02147	0.04891	0.0205		0.0089		0.02264		0.02487	0.02405	0.04277		0.03034		0.06468		0.13461	0.03175	0.19579		0.05053		0.072
0.01972	0.83458	0.02697		0.00525		0.02603		0.02455	0.27399	0.03634		0.01646		0.0594		0.71412	0.85892	0.06587		0.0271		0.71778
0.00853	0.06558	0.04175		0.0272		0.0425		0.01636	0.03776	0.10343		0.00215		0.04834		0.79689	0.00178	0.76684		0.01665		0.04699
0.04342	0.03259	0.02687		0.03457		0.12604		0.02478	0.03912	0.01441		0.02444		0.10454		0.00331	0.19763	0.20672		0.44385		0.02279
0.02218	0.01375	0.0219		0.00164		0.01118		0.06561	0.07097	0.05601		0.00354		0.04852		0.15931	0.85307	0.11968		0.05134		0.27788
0.05615	0.0177	0.01609		0.10561		0.01876		0.10231	0.05637	0.06306		0.17022		0.04866		0.1116	1.12719	0.13873		0.90831		0.05431
0.00912	0.00604	0.02069		0.03909		0.0302		0.01125	0.04699	0.06505		0.04719		0.02464		0.06357	0.56519	0.05743		0.04144		-0.000662273
0.00587	0.4188	0.02434		0.05203		0.03375		0.01135	-0.00395	0.04824		0.05529		0.03463		0.16294	0.51667	0.21904		0.09289		0.00295
0.02082	0.02329	0.03204		0.07991		0.03367		0.02235	0.05779	0.1262		0.10142		0.06816		0.13263	0.05037	0.02325		0.06443		0.71828
0.01154	0.18282	0.02075		0.01482		0.05982		0.02118	0.04505	0.04285		0.08016		0.058		0.0556	0.33473	0.11871		0.14432		0.0076
0.04591	0.27151	0.0166		-0.01797		-0.00799		0.0154	0.18212	0.05238		0.0441		0.04622		0.01187	1.05907	0.02306		-0.09389		-0.0113
0.00872		0.49772		0.01689		0.08972		0.05692		0.07823		0.02199		0.0429		0.72701		0.62859		0.02964		0.02644
0.00834		0.01559		0.01564		0.02695		0.03679		0.03529		0.07356		0.02088		0.76542		0.23886		0.17021		0.00174
0.00709		0.04813		0.03971		0.01685		0.01505		0.06544		0.10076		0.03609		0.36153		0.13636		0.50109		0.15096
0.03246		0.02288		0.02775		0.0229		0.04006		0.04722		0.07826		0.08583		0.15847		0.3837		0.15534		0.05139
0.03037		0.03392		0.03643		0.01407		0.03937		0.05274		0.013		0.00467		0.02888		0.98439		0.03671		0.01828
0.01558		0.01691		0.02197		0.01514		0.01737		0.00602		0.09328		0.01534		0.18249		0.50248		0.07785		0.03753
0.1869		0.01273		0.04793		0.02309		0.15335		0.13793		0.10694		0.00335		0.19387		0.39693		0.22524		0.01829
0.08924		0.01978		0.02653		0.04045		0.06677		0.06738		0.08967		0.03487		1.0352		0.18366		0.05562		0.00639
0.05255		0.01623		0.04249		0.02272		0.05321		0.07004		0.07437		0.02752		0.1666		0.35156		0.04493		0.0104
0.00843		0.03358		0.03721		0.00316		0.01322		0.09069		0.08911		0.00814		0.07011		0.09259		0.05422		0.58558
0.13637		0.01814		0.07107		0.0104		0.0205		0.06017		0.07487		0.01913		0.65331		0.29433		0.09077		0.01116
0.03981		0.02029		0.06986		0.11229		0.03042		0.06602		0.06888		0.08814		0.05013		0.16453		0.09183		0.02096
0.01767		0.01033		0.01947		0.0249		0.02512		0.05531		0.07343		0.02994		0.00648		0.11068		0.11074		0.59702
0.06729		0.01324		0.03882		0.03656		0.23965		0.06936		0.02518		0.05491		0.25896		0.07244		0.39248		0.30681
0.00642		0.01297		0.02865		0.01761		0.07595		0.05951		0.02544		0.057		0.01898		0.13068		0.01053		0.04429
0.02942		0.01972		0.02512		0.02834		0.02698		0.05333		0.01897		0.07012		0.37869		0.14328		0.0602		0.71843
0.00683		0.01135		0.11485		0.06595		0.01483		0.05673		0.23101		0.05032		0.64839		0.08645		1.27195		0.09285
0.00492		0.07842		0.01858		0.03633		0.01888		0.05823		0.01951		0.03945		-0.00178		0.05101		0.02655		0.01035
0.048		0.02463		0.01717		0.0225		0.08792		0.07007		0.01022		0.03694		0.81011		0.00407		0.25316		0.05493
0.03487		0.01445		0.03429		0.06256		0.03085		0.04157		0.00894		0.0859		0.37381		0.11621		0.12622		0.15979
0.03787		0.05145		0.03886		0.03473		0.03888		0.02236		0.03647		0.02422		0.13481		-0.00244		0.06493		0.0233
0.00848		0.02264		0.02533		0.04161		0.02		0.06816		0.00947		0.04051		0.44534		0.72594		0.10916		0.01139
0.00647		0.0797		0.06779		0.0606		0.0093		0.61215		0.06019		0.03075		0.15289		1.15795		0.04871		0.03845
0.08196		-0.00521		0.07346		0.03207		0.06605		0.06956		0.07729		0.07505		0.01576		0.04494		0.08398		0.12016
0.00719		0.02356		-0.00244		0.03382		0.00928		0.06391		0.03247		0.05439		0.02913		1.35034		-0.00364		0.65246
0.00462		0.04578		0.01203		0.01101		0.01263		0.00598		0.02016		0.03919		0.15146		0.03425		0.08773		0.30829
0.19043		0.03528		0.00896		0.02552		0.1189		0.02652		0.06022		0.06215		0.06967		0.0161		0.18749		0.46192
0.01662		0.03209		0.02047		0.02781		-0.01396		0.04601		0.06056		0.0648		0.06249		0.09172		0.0246		0.01696
0.08956		0.02072		0.08621		0.00173		0.17574		0.05494		0.05629		0.04339		0.0192		0.65325		0.07832		0.03498
0.01747		0.13768		0.03474		0.03564		0.04809		0.32316		0.06965		0.07039		0.20417		0.81872		0.08166		0.88121
0.02424		0.024		0.02295		0.03642		0.02494		0.21479		0.02908		0.2397		0.67877		0.07136		0.05697		0.87892
0.00497		0.17016		0.04056		0.02604		0.01175		0.05659		0.05974		0.0644		0.04437		0.29423		0.02115		0.76574
0.14116		0.0424		0.03253		0.00864		0.06912		0.11441		0.02715		0.02136		0.0677		0.97661		0.10215		0.13384
0.01026		0.02076		0.03796		0.03534		0.0127		0.07275		0.0201		0.08429		0.38306		0.06634		0.04601		0.01174
0.03949		0.0177		0.05144		0.02075		0.05539		0.06443		0.08179		0.05185		0.01444		0.09704		0.05068		0.06009
0.01776		0.05685		0.04192		0.01571		0.0368		0.04695		0.01665		0.05979		0.05124		0.12432		0.19472		0.21197
0.01349		0.01194		0.00678		0.02703		0.03919		0.05396		0.05561		0.05616		0.07323		0.09009		0.11199		0.02328
0.00887		0.06526		0.03982		0.01377		0.02866		0.12617		0.11892		0.09775		0.27603		0.28905		0.26157		0.74544
0.022		0.00577		0.06329		0.02796		0.0346		0.000131903		0.13259		0.0362		0.0161		0.11709		0.21395		0.02701
0.26799		0.01322		0.10881		0.0106		0.10054		0.09545		0.02142		0.02272		0.45238		0.68692		0.36553		0.25592
0.02487		0.01685		0.01432		0.02077		0.02153		0.00348		0.07143		0.0129		0.09501		0.11765		0.19052		0.01627
0.06859		0.068		0.02558		0.02966		0.09553		1.75096		0.08916		0.04784		0.06026		1.18563		0.54813		0.65703
0.00845		0.07496		0.01742		0.06254		0.03216		0.07029		0.07645		0.0452		0.03458		0.16027		0.18506		0.000343139
0.00797		0.03335		0.03279		0.01886		0.03622		0.01865		0.02655		0.01008		1.16152		0.50038		0.03436		0.02142
0.02646		0.01343		0.03249		0.0392		0.04616		0.0565		0.05424		0.06646		0.0114		0.19465		0.05395		0.45847
0.04443		0.03234		0.036		0.0044		0.03793		0.06546		0.012		0.02986		0.00316		0.1366		0.1057		0.01812
0.0733		0.0693		0.01862		0.01977		0.04628		0.14856		0.1677		0.026		0.01185		1.13525		0.13656		0.01867
0.58318		0.02103		0.01526		0.03792		0.00826		0.04289		0.03321		0.0246		0.00546		0.09254		0.09444		0.000244715
0.00402		0.01804		0.03001		0.04896		0.00722		0.04507		0.07634		0.05024		0.12553		0.06919		0.04693		0.03634
0.09533		0.01209		0.01467		0.00246		0.13143		0.05628		0.06702		0.01017		1.90448		0.53245		0.03817		0.00219
0.03497		0.02182		0.05123		0.02658		0.03954		0.07173		0.05797		0.03349		0.19602		0.16927		0.08405		-0.00151
0.03243		0.02134		0.02336		-0.00548		0.0488		0.06872		0.01626		0.02971		0.61665		1.13844		0.04221		0.00895
0.05367		0.1772		0.09915		0.00622		0.05292		0.1128		0.37418		0.00699		0.94504		0.01151		0.40236		0.01269
0.02337		0.95176		0.02892		0.05928		0.00713		0.50672		-0.00945		0.0314		0.01152		1.15797		0.05562		-0.00562
0.0478		0.08553		0.07961		0.00691		0.03819		0.06076		0.08702		0.01721		0.09093		0.02853		0.04124		0.0578
0.08411		0.01337		0.08265		0.00716		0.07578		0.02002		0.05287		0.05158		0.07397		0.08456		0.20113		0.45037
0.05449		0.07445		0.02521		0.02736		0.20146		0.16437		0.06071		0.07311		-0.00952		0.05565		0.03333		1.05408
0.00991		0.01553		0.0107		0.02394		0.01738		0.06859		0.03133		0.06545		0.39032		0.37057		0.06282		0.11486
0.0044		0.08798		0.02844		0.0388		0.00916		0.05888		0.02725		0.06911		0.0583		0.17939		0.08465		0.93114
0.09311		0.06294		0.1483		0.02835		0.28939		0.18684		0.3961		0.08321		0.11576		0.12398		0.54693		0.65244
0.29355		0.0531		0.0656		0.03796		0.10955		0.02866		0.03139		0.03537		0.3498		0.04551		0.04211		-0.00578
0.05587		0.01476		0.0244		0.00529		0.05467		0.01754		0.06217		0.0729		0.88932		0.09902		0.04203		-0.0137
0.07671		0.04751		0.06648		0.04806		0.13264		0.08039		0.14195		0.04807		0.9488		1.41293		0.47499		0.04321
0.05365		0.01587		0.03877		0.06052		0.05438		0.0423		0.01237		0.19096		0.64933		0.13628		0.03161		0.46582
0.27937		0.06951		0.08594		0.00255		0.19794		0.0704		0.05543		0.00352		0.03756		0.05563		-0.00561		1.09703
0.0272		0.01488		0.01101		0.04281		-0.0089		0.04582		0.09672		0.09311		0.09207		0.10133		0.04108		0.90715
0.07407		0.02522		0.03595		0.05291		0.04587		0.09632		0.00661		0.05293		1.09143		1.0857		0.02557		0.09031
0.12215		0.01408		0.03998		0.02792		0.02658		0.03757		0.01604		0.05303		0.08195		0.13222		0.22351		0.04048
0.02774		0.01387		0.02981		0.02031		0.01244		0.03956		0.01699		0.06821		0.62381		0.01886		0.06643		0.15433
0.059		0.03135		0.02825		0.02797		0.01873		0.09483		0.06981		0.04861		0.01683		0.91683		0.55789		0.15336
0.02831		0.01531		0.0479		0.03059		0.00909		0.04104		0.05047		0.04992		0.07773		0.07619		0.07405		0.17055
0.05187		0.00703		0.06339		0.05536		0.01561		0.02913		0.02996		0.04255		0.02148		0.98488		0.04706		0.06909
0.07435		0.26745		0.00518		0.04552		0.04906		0.05357		0.00346		0.09823		0.14045		0.76179		0.02356		0.97001
0.02879		0.01315		0.0747		0.03523		0.01318		0.06689		0.02801		0.01772		0.00505		0.02899		0.16581		0.01107
0.09139		0.00858		0.06463		0.02009		0.0944		0.04529		0.03503		0.0512		0.04587		0.75405		0.03955		0.29868
0.02458		0.04266		0.02113		0.04549		0.01488		0.08056		0.06681		0.02929		0.13048		0.02865		0.07403		0.01823
0.25947		0.01356		0.07513		0.02357		0.03483		0.05229		0.17408		0.01861		0.53155		0.0531		0.40308		0.00817
0.11763		0.02776		0.04193		0.01118		0.08446		0.03862		0.02298		0.01354		0.03939		0.0241		0.34234		0.01879
0.07775		0.01453		0.0251		0.03401		0.02471		0.03318		0.05692		0.02672		0.00133		0.15771		0.03478		0.00143
0.11355		0.01797		0.03339		0.0172		0.08082		0.10285		0.10257		0.08056		0.87214		1.84297		0.25938		0.11781
0.03557		0.09393		0.03115		0.01625		0.11649		0.53149		0.07555		0.03559		1.36219		1.02361		0.49807		0.08685
0.00599		0.01792		0.10943		0.03985		0.01214		0.05443		0.09062		0.0676		0.0737		0.11332		0.04314		0.11328
0.01813		0.00941		0.04712		0.04858		0.01948		0.029		0.02731		0.02686		0.04025		0.09681		0.42459		0.00321
0.00924		0.05256		0.06897		0.03487		0.0065		0.10512		0.01551		0.07392		0.24643		0.04978		0.0332		0.7199
0.11625		0.06		0.01986		0.00792		0.07743		0.09721		0.00857		0.00821		0.98116		0.16969		0.14161		0.01139
0.03627		0.0119		0.02257		0.01114		0.04391		0.04927		0.0067		0.02536		0.00102		0.31716		0.05601		0.13777
0.02634		0.02244		0.01221		0.02648		0.02774		0.04215		0.06913		0.05496		0.07606		0.49366		0.04731		0.11744
0.02678		0.01144		0.00975		0.052		0.03767		0.02671		0.02738		0.03883		0.0521		0.06198		0.11525		0.07103
0.00926		0.03263		0.02485		0.01421		-0.00225		0.04527		0.37868		0.0548		0.03419		0.82464		0.58508		0.16748
0.01847		0.01233		-0.00516		0.02582		0.07357		0.05541		0.03156		0.06173		1.08747		0.16098		0.07832		0.00703
0.00687		0.01124		0.04816		0.04183		0.01126		0.05086		0.05376		0.074		0.30705		0.14902		0.0514		0.15261
0.00855		0.024		0.00482		0.40836		0.01703		0.04379		0.12315		0.0876		0.02991		0.16065		0.63458		0.81534
0.00916		0.01202		0.07909		0.01867		0.01269		0.04042		0.03689		0.04167		0.43987		0.21802		0.06258		0.04684
0.01076		0.01436		0.01151		0.03671		0.05267		0.06679		0.26043		0.04218		0.47663		1.09519		1.32961		0.01679
0.04402		0.01255		-0.01606		0.04186		0.03557		0.03646		0.07971		0.04377		1.09869		0.07688		0.02567		0.01488
0.01559		0.05854		0.0305		0.02637		-0.03465		0.10292		0.00293		0.0392		0.02378		0.05833		0.01744		0.08288
0.26777		0.01419		0.0034		0.04021		0.17067		0.03809		0.02285		0.05891		1.09201		0.12749		0.15247		0.58914
0.00406		0.05053		-0.02316		0.01118		0.0688		0.17665		0.04555		0.02399		0.39053		0.27712		0.00691		0.01888
0.02904		0.06284		0.01141		0.01648		0.04744		0.02435		0.02233		0.01251		0.33092		0.12121		0.03558		0.01511
0.41497		0.01132		0.02817		0.07021		0.03982		0.05787		0.12489		0.10147		0.62259		0.37694		0.03282		0.19164
0.19766		0.29668		0.04016		0.04064		0.05179		0.06189		0.08522		0.07559		0.02602		0.28675		0.30467		0.20911
0.01923		0.01477		0.02082		0.03814		0.10636		0.04982		0.07953		0.04558		0.35361		0.11424		1.1511		0.00672
0.01179		0.28562		-0.00453		0.03231		0.03686		0.04699		0.11577		0.08135		0.12174		0.56502		0.06154		0.1901
0.64788		0.02277		0.00838		0.01459		0.2342		0.13013		0.01528		-0.01562		1.24875		0.50395		0.19349		0.03669
0.05653		0.01733		-0.000266331		0.01744		0.0516		0.04595		0.0143		0.02507		0.16746		0.05184		0.08343		0.18699
0.02873		0.01522		0.00638		0.04756		0.02847		0.02926		0.01562		0.08327		0.03621		0.0688		0.04513		1.10616
0.14396		0.01368		0.03456		0.03425		0.03989		0.04042		0.02289		0.04124		0.02136		0.0549		0.1811		0.07688
0.06433		0.02717		0.01582		0.03298		0.06874		0.05749		0.07785		0.03929		0.05423		0.57044		0.11662		0.8411
0.00742		0.03032		0.11553		0.09103		0.00976		-0.00542		0.02726		0.06299		0.1033		0.7742		0.74258		0.01983
0.04914		0.01845		0.01406		0.02274		0.06185		0.06405		0.06767		0.05156		0.54169		0.1338		0.12271		0.06487
0.01453		0.01123		0.0344		0.05748		0.03287		0.02981		0.0823		0.07375		0.11046		0.06719		-0.00224		0.01523
0.00847		0.01122		0.06723		0.0163		0.0112		0.05981		0.04192		0.0263		0.09847		0.61528		0.10975		0.01195
0.36817		0.01598		0.03249		0.02658		-0.05404		0.05243		0.02615		0.06352		3.00507		0.18914		0.05343		0.08967
0.01136		0.01157		0.03552		0.04238		0.01357		0.05116		0.01954		0.14183		0.44448		0.26704		0.08279		0.00154
0.03896		0.09332		-0.00277		0.04451		0.01551		0.08562		0.24216		0.0349		0.00429		0.98082		-0.07439		0.00472
0.01228		0.02193		0.03127		0.01947		0.06205		0.06635		0.01529		0.03657		0.67602		0.15283		0.10279		0.16665
0.06132		0.0184		0.05171		0.06514		0.05527		0.04691		0.08694		0.04682		0.01472		0.54069		0.11859		-0.000522866
0.03243		0.01117		0.03375		0.05641		0.07695		0.04016		0.01088		0.03954		0.08274		0.2394		0.29487		0.01151
0.15615		0.07757		0.03687		0.15563		-0.03494		0.2692		0.02637		0.1044		1.50595		0.52223		0.11265		2.93055
0.00782		0.03124		0.07541		0.03545		0.00748		0.02905		0.12715		0.08802		0.28129		0.04064		0.12106		0.01168
0.00881		0.07272		0.06937		0.04285		0.0619		0.16251		0.02138		0.03095		0.51613		0.53599		0.17919		0.00958
0.00859		0.00826		0.04073		0.03271		0.01359		0.04709		0.02078		0.05212		0.07431		1.21011		0.10313		0.00728
0.00865		0.01375		0.02649		0.022		0.01685		0.01899		0.01537		0.07252		0.09074		0.09668		0.06642		0.65549
0.07762		0.0136		0.1032		0.0396		0.0411		0.03586		0.23264		0.03652		0.3983		0.09535		1.19983		0.02488
0.01012		0.01312		0.02672		0.03249		-0.01147		0.03167		0.01474		0.04694		0.02735		0.12163		0.08277		0.02676
0.00996		0.40978		0.00983		0.00915		0.04682		0.08687		0.08141		0.04298		0.28639		0.24306		-0.000346909		0.02592
0.00556		0.01441		0.23667		0.00662		0.01224		0.03155		0.04088		0.02328		0.07389		0.10997		0.08557		0.37874
0.08692		0.01849		0.03805		0.01313		0.03394		0.02547		0.09762		0.06111		0.35684		0.12684		0.02471		0.17004
0.02948		0.08322		0.02519		0.00975		0.07276		0.07672		0.08966		0.02181		-0.01178		0.14088		0.28277		0.02402
0.03272		0.06561		0.02822		0.01212		0.02322		0.05635		0.10721		0.03118		0.06588		0.07285		0.00867		0.00913
0.04325		0.08126		0.02443		0.06183		0.04161		0.19052		0.03863		0.02997		0.64467		0.37922		0.05441		-0.01404
0.11918		0.02111		0.06365		0.01706		0.09361		0.02406		0.10516		0.0162		0.05656		0.14135		0.09484		0.18372
0.01465		0.029		0.02831		0.02771		0.01957		0.04526		-0.0059		0.02289		0.10823		0.08276		0.03561		0.00295
0.01359		0.11879		0.03696		0.03973		0.01455		0.07098		0.03255		0.0959		0.04384		0.31065		0.10296		0.49409
0.03951		0.00937		0.05799		0.03028		0.03981		0.04263		0.05015		0.06255		0.02312		0.0103		0.08169		0.90037
0.03343		0.09892		0.02285		0.00362		0.03059		0.14646		0.01991		-0.000179116		0.09459		1.00014		0.1065		0.00284
0.00545		0.00791		0.06627		0.00565		0.00941		0.05846		0.03452		0.01711		0.48392		0.05185		0.49399		0.02409
0.03183		0.00605		0.04565		0.04949		0.0365		0.09348		0.01331		0.03351		0.02774		1.8647		0.43882		-0.00655
0.18858		0.36638		0.0124		0.07647		0.12373		0.08143		0.06311		0.11596		0.04271		0.6879		0.04125		1.82423
0.06915		0.01837		0.05259		0.0166		0.07075		0.0711		0.02729		0.05071		0.57104		0.07048		0.69535		0.23875
0.02296		0.07714		0.03372		0.07565		0.03528		0.05526		0.02526		0.0759		0.024		0.03348		0.04744		0.08815
0.02291		0.07799		0.06655		0.02136		0.07543		0.09714		0.30294		0.04327		0.61595		0.69516		0.34905		0.23007
0.09291		0.01606		0.02721		0.03252		0.04349		0.02316		0.02768		0.10017		0.16367		0.13801		0.17666		0.03972
0.00941		0.01225		0.04086		0.0447		0.00971		0.03014		0.04436		0.04133		0.10549		0.25358		0.03276		0.51672
0.02791		0.07019		0.03099		0.01398		0.07632		0.08331		0.05572		0.08264		0.0177		-0.00617		0.03684		0.17583
1.1933		0.20069		0.02011		0.01541		0.04801		0.04968		0.17653		0.04437		0.01706		0.28602		0.33878		0.01909
0.04827		0.01188		0.07246		0.0273		0.06904		0.05835		0.11525		0.05723		0.10785		0.05884		-0.00847		0.58409
0.01617		0.00556		0.01285		0.03248		0.01803		0.02703		0.08553		0.06533		0.02712		0.11337		0.05162		0.02657
0.01323		0.21355		0.02734		0.00489		0.01518		0.23044		0.02491		0.01685		0.70324		0.22967		0.03351		0.01065
0.02088		0.15915		0.03115		0.03876		0.02869		0.08978		0.00743		0.11323		0.02587		0.59152		0.14927		0.24542
0.02383		0.01423		0.0366		0.01076		0.02925		0.03877		0.04028		0.023		0.05037		0.40144		0.02806		0.04132
0.00518		0.29331		0.05811		0.02387		0.00896		0.06352		0.04389		0.06682		0.03738		0.45138		0.0423		0.82177
0.00488		1.00825		0.04324		0.07227		0.00909		0.28089		0.04486		0.23567		0.12703		1.21579		0.06103		0.28498
0.00394		0.0282		0.01658		0.05699		-0.00887		0.03366		0.05939		0.14541		0.33564		0.04098		0.12309		0.2126
0.00437		0.01746		0.02724		0.0337		0.00838		0.05363		0.01642		0.07718		0.33911		0.11756		0.07434		0.04543
0.03275		0.47177		0.01604		0.01044		0.04026		0.04343		0.05329		0.04951		0.25473		0.59755		0.20194		0.11815
0.00409		-0.00629		0.02685		0.03257		-0.00755		0.01955		0.025		0.09525		0.18152		0.77268		0.13266		0.23458
0.01508		1.47818		0.10402		0.02239		0.02809		1.48801		0.2247		0.03569		0.1689		1.42842		0.16024		0.35493
0.00452		0.15488		0.02972		0.04537		-0.02732		0.02554		0.01425		0.03165		0.43514		0.37481		0.07059		0.20913
0.00367		0.02035		0.01694		0.03805		0.00195		0.0548		0.02041		0.05226		0.24928		1.4387		0.02806		0.03982
0.00695		0.12641		0.04696		0.04952		0.00949		0.08645		0.05401		0.05057		0.27517		0.02864		0.03343		0.03036
0.01099		0.13051		0.02911		0.05788		0.01999		0.06246		0.01425		0.06696		0.06446		0.06801		0.05913		0.01885
0.01887		0.11375		0.01829		0.00835		0.04837		0.16116		0.0339		0.03019		0.25992		1.98832		0.05241		0.02661
0.00584		0.04853		0.06439		0.01387		0.00898		0.09293		0.0875		0.0894		0.39872		0.06093		0.39897		0.17876
0.00529		0.10951		0.02131		0.02458		0.01002		0.29212		0.06623		0.04208		0.03631		0.63395		0.36499		0.21798
0.01035		0.45141		0.00464		0.02238		0.0247		0.38894		0.00839		0.04397		0.0734		0.55563		0.09588		0.19279
0.01408		0.01932		0.00918		0.00974		0.04894		0.02041		0.06458		0.05685		0.87234		0.11992		0.18372		0.1886
0.05334		0.60004		0.04922		0.01173		0.02885		0.11244		0.04191		0.01005		0.52304		0.73097		0.06215		0.08
0.05273		0.40964		0.00837		0.02353		0.05101		0.41797		0.0117		0.06173		0.31048		0.67155		0.15919		0.3604
0.00689		0.13745		0.0258		-0.00591		0.00851		0.04189		0.01436		0.03759		0.04385		0.06774		0.28353		0.03335
0.15742		0.02603		0.12498		0.08717		0.00554		0.03377		0.31674		0.08426		0.46207		0.18481		0.95733		0.91047
0.00838		0.00419		0.04372		0.09746		0.01583		0.00825		0.02816		0.13195		0.19514		0.01839		0.08081		0.92314
0.01334		0.16919		0.04134		0.00885		0.01642		0.0444		0.07264		0.01617		0.00205		0.05856		0.04752		0.04554
0.00447		0.1972		0.03133		0.02448		0.00952		0.04452		0.09651		0.0596		0.17992		0.09623		0.31857		0.65952
0.01383		0.22759		0.02775		0.02855		0.04159		0.01537		0.01499		0.07883		0.01515		0.03334		0.07892		0.05242
0.01266		0.42635		0.03457		0.02286		-0.00415		0.0428		0.08639		0.06142		0.02204		0.05639		0.73371		0.79333
0.02282		0.41018		0.04262		0.02232		0.00789		0.05905		0.02276		0.07142		0.0117		0.28587		0.55631		0.13504
0.00741		0.03911		0.21395		0.04088		0.01143		0.0559		0.02058		0.09782		0.0615		0.1615		0.26499		0.94455
0.20195		0.18887		0.046		0.01331		0.15048		0.03497		0.03755		0.07811		0.04749		0.10477		0.02666		0.1293
0.00685		0.48486		0.01795		0.01915		0.01432		0.05823		0.06933		0.01283		0.21067		1.21376		0.18449		0.04079
0.03401		0.36084		0.02494		0.04705		0.03765		0.50569		0.09486		0.06444		0.01432		0.03663		0.534		0.14543
0.01363		0.23865		0.04801		0.02743		0.03888		0.1565		0.01694		0.07405		0.66558		0.22406		0.10355		0.07131
0.02007		0.72744		0.04144		0.0313		0.02463		0.06833		0.01501		0.05293		0.02659		0.64736		0.21349		0.10506
0.0077		0.0386		0.05927		0.02173		0.01196		0.0884		0.1391		0.03085		0.0827		0.05596		1.12219		0.27833
0.04181		0.12431		0.03815		0.02208		0.04247		0.08649		0.07575		0.04478		0.01558		0.01659		0.16206		0.12763
0.01011		0.87751		0.05624		0.0361		0.37453		0.1159		0.11053		0.08838		0.42166		0.9289		0.17577		0.17305
0.00583		0.11527		0.0375		0.06945		0.01171		0.015		0.09907		0.12738		0.12665		0.03846		0.15044		0.95614
0.01274		0.15873		0.09371		0.01002		0.06439		0.13311		0.03081		0.02099		0.90159		-0.00306		0.0549		0.00861
0.29854		0.01602		0.02497		0.02741		0.08465		0.02285		0.02586		0.06303		0.42076		0.34545		0.0482		0.10149
0.03379		0.41617		0.05258		0.0213		0.04434		0.00587		0.03102		0.04113		0.36919		0.61442		0.0663		0.04377
-0.0044		0.15553		0.07681		0.01707		0.00518		0.01812		0.08908		-0.000728541		0.08533		0.06072		-0.00292		0.04069
0.03809		0.10813		0.02643		0.10921		0.03541		0.06435		0.02123		0.09419		0.02741		1.63591		0.08313		0.24045
0.03179		0.27508		0.08596		0.02162		0.04574		0.0191		0.09497		0.0593		0.14617		0.02713		0.07585		0.11442
0.00732		0.03164		0.0298		0.01848		0.01104		0.0864		0.01251		0.04441		0.49721		0.03421		0.1398		0.08551
0.02183		0.3067		0.03012		0.02683		0.03329		0.1108		0.00894		0.0141		0.45158		0.04876		0.20369		0.01841
0.01271		0.69384		0.04873		0.03086		0.01637		0.60234		0.06647		0.04245		0.04209		0.45959		0.01747		0.10074
0.07939		0.41177		0.02651		0.02799		0.06607		0.53995		0.03171		0.07667		0.03458		0.02693		0.05214		0.06386
0.00668		0.59202		0.02286		0.01471		-0.000697022		0.05182		0.01472		-0.01471		0.01323		0.85425		0.04955		0.03524
0.06047		0.0395		0.03952		0.02089		0.12334		0.05129		0.03338		0.04562		0.04658		1.32951		0.01655		0.05795
0.12862		0.20096		0.00457		0.03171		0.27242		0.12379		0.01167		0.04653		0.25606		0.01112		0.08181		0.25526
0.03655		0.0258		0.05964		0.02353		0.05668		0.06069		0.03196		0.06721		0.81738		0.68134		0.000470649		0.8004
0.00647		0.25519		0.06945		0.000324041		0.01178		0.11009		0.05389		0.03191		0.35531		-0.00405		0.03637		0.04043
0.01684		0.07103		0.02768		0.04437		0.06089		0.18862		0.07565		0.06879		0.02381		0.66998		0.48536		0.14149
0.09608		0.44704		0.0979		0.06055		0.03726		0.06353		0.41569		0.09399		0.01157		1.577		1.59428		1.04924
0.0496		0.38079		0.02441		0.03193		0.06412		0.60052		0.01438		0.0945		0.01534		0.35739		0.1499		0.01961
0.0634		0.03877		0.02786		0.01991		0.08556		0.11419		-0.01022		0.0602		0.10594		0.10416		0.0468		0.1533
0.26625		0.47647		0.0632		0.02845		0.06084		0.06542		0.02243		0.04466		0.00908		1.63281		0.05374		0.15644
0.09479		0.78771		0.01883		0.01752		0.03908		0.28071		0.06118		0.01927		0.00329		0.8653		0.05425		0.06806
1.3845		0.74738		0.0259		0.01153		0.89299		0.11128		0.03366		0.02146		3.87076		0.78569		0.03543		0.04611
0.00982		0.92253		0.0442		0.01862		-0.0102		0.67945		0.02778		0.07942		0.03498		0.97126		0.11526		0.54777
0.04699		0.81576		0.02522		0.00162		0.04131		0.11809		0.05025		0.00408		0.52791		0.9911		0.0198		0.00443
0.07396		0.89904		0.08355		0.12083		0.0588		0.05598		0.14106		0.13203		0.94497		0.90119		0.09793		0.08749
0.10058		1.05847		0.04576		0.04654		0.04622		0.0734		0.2217		0.09601		1.0075		1.57065		0.62208		0.18732
0.02491		0.04351		0.01542		0.03471		0.03245		-0.00244		0.05469		0.08393		-0.000107001		0.02752		0.02453		0.06171
0.00883		0.05522		0.02255		0.05126		-0.00812		0.19009		0.09684		0.03717		0.03185		0.34192		0.48519		0.01436
0.0417		0.38377		0.02747		0.04848		0.03355		-0.01911		0.01157		0.02712		0.02059		0.03096		0.22901		0.59378
0.01388		0.76308		0.01244		0.00804		0.03573		0.10916		0.04208		-0.00447		0.44904		1.16844		0.03916		0.02776
0.01192		1.05815		0.11772		0.03898		0.03903		0.60754		0.13299		0.0802		0.51208		1.36503		0.4295		0.1206
0.02541		1.06973		0.04824		0.00116		0.00619		0.13953		0.00506		0.00302		0.07618		0.835		0.09475		0.00608
0.04756		0.59168		0.05055		0.04819		0.04423		0.02087		0.03059		0.04277		0.02095		1.19061		0.17753		0.000918035
0.0146				0.03135		0.03304		0.00151				0.0401		0.02522		0.017				0.17871		0.00366
0.0179				0.0432		0.02386		0.05047				0.01455		0.02435		0.46324				0.06019		0.00156
0.03726				0.01088		0.02331		0.0568				0.06734		0.04317		0.0647				0.30669		0.37301
0.24908				0.08379		0.01915		0.10924				0.22267		0.07381		0.04697				0.13419		0.61286
0.12855				0.02306		0.02192		0.0219				0.01536		0.03218		0.00832				0.03229		0.04
0.01176				0.0329		0.02615		0.00203		0.01873		0.02489		0.06849		0.04363		--		0.04868		0.81362
0.02271				0.01195		0.04004		0.04885		0.01867		0.03708		0.03308		1.05937		--		0.03575		0.01006
0.00717				0.0419		0.02679		0.01546		0.01852		0.02242		0.05812		0.04349		--		0.06499		0.42125
0.00603				0.02411		0.03732		0.01265		0.01806		0.01703		0.02693		0.13423		--		0.1954		0.25775
0.01185				0.00596		0.04506		0.03271		0.01803		0.00621		0.07241		0.03291		--		0.09049		0.36734
0.00626				0.05639		0.02955		0.01447		0.01747		0.05777		0.03031		0.1386		--		0.04931		0.05
0.00812				0.09472		0.01307		0.01715		0.01742		0.08275		0.01446		0.25931		--		0.07186		0.00946
0.00516				0.10778		0.03159		0.01427		0.01738		0.07566		0.07283		0.09607		--		0.23937		0.74291
0.01196				0.02557		0.02571		0.01574		0.01737		0.01998		0.08757		0.15371		--		0.04157		0.73999
0.04701				0.0224		0.0238		0.04129		0.01726		0.01259		0.05841		0.07417		--		0.08049		0.11281
0.04304				0.02908		0.0087		0.05106		0.01715		0.01501		-0.00785		0.01849		--		0.08608		0.02352
0.34006				0.06614		0.02884		0.2387		0.01707		0.09683		0.08071		0.20281		--		0.15363		0.15568
0.00479				0.04113		0.01318		0.01742		0.01703		0.01374		-0.02647		0.04501		--		0.05527		0.0429
0.09728				0.02809		0.03742		-0.18724		0.01703		0.00736		0.08557		0.35537		--		0.18995		0.2309
0.21199				0.04145		0.0423		0.14749		0.01703		0.10969		0.10614		0.50942		--		0.11496		0.12979
0.04078				0.05925		0.03032		0.0502		0.01693		0.04922		0.063		0.0356		--		0.05915		0.64515
0.01739				0.06668		0.01995		0.02605		0.01685		0.04791		0.04482		0.94343		--		0.00371		0.03543
0.000675342				0.03276				-0.000842337		0.01668		0.01724				0.11385		--		0.08138
0.1403				0.03014				0.07929		0.01656		0.08112				0.02918		--		0.05517
0.10504				0.07121				0.06573		0.01642		0.05058				0.01524		--		0.09252
0.10599				0.03836				0.38065		0.01637		0.11696				-0.00779		--		0.29602
0.01302				0.07215				0.00559		0.01636		0.06417				0.00619		--		0.68024
0.01191				0.06061				-0.00168		0.01622		0.09981				0.39911		--		0.15488
0.0349				0.03635				0.05212		0.01622		0.01569				0.07389		--		0.33539
0.00803				0.05531				-0.01754		0.01583		0.01853				0.02785		--		0.02425
0.00973				0.053				0.05603		0.01574		0.04147				0.70667		--		0.35415
0.01203				0.02806				0.02144		0.01569		0.06648				0.13188		--		0.17306
0.00994				0.02148				0.04136		0.01567		0.01823				0.68037		--		0.05327
0.02102				0.05459				0.05266		0.01561		0.0285				0.35565		--		0.39156
0.11767				0.02872				0.09719		0.01553		0.01559				0.14541		--		0.03332
0.02086				0.01165				0.03796		0.01551		0.04793				0.06759		--		0.01583
0.00876				0.04983				0.01298		0.01546		0.02011				0.52505		--		0.03708
0.0129				0.00993				0.03696		0.0154		0.01844				0.23203				0.02254
0.01543				0.0418				0.02058		0.01532		0.0725				0.08007				0.11223
0.00512				0.03856				-0.01906		0.01518		0.03237				0.0332				0.04183
0.0093				0.0461				0.06037		0.01505		0.05553				0.32321				0.03798
0.0069				0.02499				0.00773		0.01499		0.07236				0.24464				0.0359
0.06472				0.02577				0.09197		0.01495		0.01781				0.06288				0.04483
0.00723				0.02446				0.00888		0.01488		0.06898				0.03686				0.21406
0.19178				0.04378				0.11088		0.01484		0.02519				0.38878				0.21075
0.02965				0.04335				0.03677		0.01483		0.03163				0.0308				0.03613
0.06623				0.02858				0.1138		0.01471		0.07731				0.02355				0.14276
-0.00195				0.04593				0.04383		0.01455		0.01572				0.00317				0.07577
0.04643				0.07484				0.01208		0.01447		0.17987				1.02147				1.1622
0.03632				0.01998				0.0274		0.01438		0.01196				0.20659				0.04773
0.04004				0.00546				0.03072		0.01432		0.05887				0.00882				0.46069
0.13371				0.1547				0.11932		0.01431		0.38247				0.21995				0.47384
0.00927				0.01653				0.05502		0.01427		0.0176				0.33226				0.02445
0.05595				0.02629				0.02539		0.01371		0.04923				0.01799				0.03462
0.00885				0.01958				0.01078		0.01367		0.05027				0.03506				0.0078
0.51778				0.03019				0.57463		0.01359		0.0765				0.37119				0.31108
0.00958				0.02543				0.01371		0.01359		0.02229				0.03743				0.05951
0.01995				0.02384				0.06573		0.01357		0.03025				0.31748				0.14633
0.03307				0.05399				0.03831		0.01322		0.04457				0.94088				0.13883
0.03455				0.01565				0.0345		0.01318		0.09791				0.02514				0.04661
0.00721				0.01756				0.01213		0.01298		0.08608				0.52998				0.38111
0.02588				0.05354				0.05		0.01296		0.02103				0.01291				0.05166
0.02482				0.03905				0.01495		0.0127		0.08712				0.03129				0.14859
0.01532				0.08558				0.05175		0.01269		0.06307				0.04904				0.04627
0.02364				0.0344				-0.02716		0.01265		0.0783				0.04576				0.92129
0.06726				0.02335				0.09618		0.01263		0.0224				0.15284				0.10591
0.07965				0.00958				0.07954		0.01256		0.00364				0.61279				0.07924
0.02359				0.02106				0.04223		0.01244		0.07089				0.04237				0.12427
0.00818				0.0385				0.01726		0.01235		0.09561				0.10415				0.1675
0.00919				0.0395				0.01656		0.0123		0.01017				0.4379				0.15883
0.04583				0.02985				0.04022		0.01224		0.01398				0.0616				0.0331
0.00435				0.0345				0.05365		0.01219		0.05132				0.42959				0.04954
0.00734				0.01081				0.00732		0.01214		0.08949				0.08807				0.15576
0.00577				0.04186				0.03124		0.01213		0.0794				0.32094				0.07007
0.04131				0.02618				0.04901		0.01211		0.07151				0.03884				0.42729
0.01614				0.02103				0.02732		0.01208		0.0664				0.02545				0.84326
0.03567				0.08092				0.00936		0.01196		0.04751				0.71046				0.00147
0.0061				0.01029				0.02092		0.01178		0.03008				0.00901				0.05312
0.00606				0.00576				0.02456		0.01175		0.05095				0.48344				0.03311
0.02453				0.04886				0.03282		0.01171		0.03343				0.10024				0.0576
0.03683				0.02851				0.04134		0.01143		0.03662				0.03798				0.04525
0.11792				0.0311				0.00837		0.01135		0.02667				0.17077				0.04679
0.00777				0.09581				0.01569		0.01126		0.17993				0.1772				0.55074
0.00744				0.06496				0.01359		0.01125		0.01067				0.05				0.15119
-0.00403				0.03569				0.04646		0.0112		0.03114				0.72758				0.04576
0.04172				0.05183				0.05442		0.0112		0.02043				0.23499				0.05971
0.00572				0.01881				0.03738		0.01104		0.02047				0.51194				0.05827
0.1235				0.06331				0.08161		0.01086		0.02659				0.03464				0.06936
0.00478				0.03657				0.01471		0.01078		0.07628				0.07797				0.04272
0.01478				0.02321				0.02938		0.01074		0.04685				0.12686				0.36622
0.02479				0.04986				0.057		0.01054		0.0408				0.02329				0.04332
0.04676				0.05056				0.05095		0.01002		0.01309				0.19238				0.30305
0.0099								-0.01006		0.00976						0.03545
0.03452								0.13189		0.00971						0.33562
0.06913								0.07082		0.00959						0.47615
0.01615								0.03822		0.00952						0.0207
0.16985								0.03926		0.00949						0.05258
0.00485								-0.01268		0.00941						0.06522
0.01577								0.05585		0.00936						0.71533
0.10253								0.07475		0.0093						0.30384
0.01263								0.05198		0.00928						0.53085
0.01								0.01622		0.00916						0.49192				--
0.01816								0.0235		0.00909						0.0176				--
0.05535								0.01747		0.00909						0.13275				--
0.00733								0.01668		0.00898						0.0243				--
0.05628								0.02789		0.00896						0.07021				--
0.01481								0.01567		0.00888						0.21392				--
0.0078								0.01912		0.00866						0.10381				--
0.00489								0.01367		0.00851						0.15571				--
0.02262								0.0299		0.00845						0.13047				--
0.02049								0.05056		0.00838						0.00576				--
0.07727								0.03821		0.00837						0.66714				--
0.11551								0.14512		0.00826						0.0983				--
0.02609								0.03895		0.00789						0.17839				--
0.05885								0.03323		0.00773						0.01082				--
0.02657								0.10453		0.00748						0.15528				--
0.05536								0.04031		0.00732						0.05192				--
0.08095								0.09455		0.00722						0.09261				--
0.14637								0.10394		0.00713						0.01669				--
0.02016								0.01852		0.00688						0.28783				--
0.00722								0.02821		0.0065						0.27828				--
0.00572								0.02329		0.00619						0.02361				--
0.01622								0.02648		0.00559						0.18719				--
0.01611								0.02588		0.00554						0.03075				--
0.02169								-0.01368		0.00315						0.04053				--
0.01415								-0.00285		0.00203						0.02029				--
0.0213								0.01875		0.00195						0.06277				--
0.07555								0.02766		0.00151						0.00775				--
0.03561								0.05486		-0.000697022						0.13759				--
0.02067								0.026		-0.000842337						0.05018				--
0.03153								0.03205		-0.00135						0.14734				--
0.04521								0.0497		-0.00143						0.03434				--
0.00913								-0.00135		-0.00168						0.27531				--
0.22463								0.1356		-0.00168						0.36079				--
0.01422								0.00688		-0.00225						0.01953				--
0.0147								0.0259		-0.00271						0.66864				--
0.05735								0.05097		-0.00285						0.2421				--
0.1113								0.29181		-0.00338						0.32679				--
0.00486								-0.00338		-0.00369						0.03142				--
0.04124								0.01438		-0.00415						0.0081				--
0.03997								0.04992		-0.00484						0.02742				--
0.02482								0.0248		-0.00755						0.07003				--
0.00521								-0.01003		-0.00812						0.48778				--
0.08811								0.06342		-0.0082						0.92032				--
0.00356								-0.01381		-0.00887						0.02021				--
0.07062								0.06009		-0.0089						0.04601				--
0.04556								0.04405		-0.01003						0.02624				--
0.09553								0.0341		-0.01006						0.16749				--
0.00888								0.01622		-0.0102						0.04873				--
0.01829								-0.02392		-0.01147						0.03991				--
0.05468								0.04246		-0.01268						0.02109				--
0.02021								0.04018		-0.01368						0.13922				--
0.02002								0.02644		-0.01381						0.27794				--
0.31017								0.09826		-0.01396						0.32879				--
0.01852								-0.01794		-0.01673						0.02097				--
0.03394								0.03683		-0.01754						0.02003				--
0.00529								0.04829		-0.01794						0.38397				--
0.00651								0.01296		-0.01906						0.05615				--
0.045								0.16594		-0.02392						0.77736				--
0.04008								0.03849		-0.02716						0.02234				--
0.21289								0.09647		-0.02732						0.14095				--
0.19722								0.1734		-0.03465						0.78236				--
0.0543								0.10901		-0.05121						0.06382				--

## Sheet: Responding neurons per mouse
TRPM3				TRPA1				TRPV1
Contralateral		Ipsilateral		Control	Control	CFA	CFA	Control	Control	CFA	CFA
WGA-	WGA+	WGA-	WGA+	AF-	AF+	AF-	AF+	AF-	AF+	AF-	AF+
0.21875	0	0.04167	0.2	0.25	0.1	0.04167	0.5	0.48718	1	0.81579	0.8
0	0.63636	0.25	0.91667	0.38095	0.16667	0.11765	0.33333	0.0625	0.2	0.04167	0.70588
0.0625	0.1	0.35185	0.66667	0.10959	0.14286	0.12963	0.05882	0.92857	0	0.57407	0.8
0.10959	0.28571	0.17241	0.25	0.02	0.6	0.10345	0.6	0.62	0.66667	0.61765	0.91667
0.07143	0	0.5	0.23077	0	0	0.42105	0.3	0.53425	0.85714	0.72727	1
0.52381	0	0.09091	0.5	0.125	0	0.27397	0.15385	0.3125	0.42857	0.70833	1
0.11111	0.11111	0.13158	0.88235	0.07692	0	0.36364	0.33333	0.4127	0.45455	0.73973	0.33333
0.02	0	0.09589		0.0641	0	0.41667		0.90476	0.36364	0.7931
0.35897	0.4			0.28571	0.09091			0.97436	1
0.02564				0.03175				0.28571
Only experiments with a minimum of 5 neurons responding to K+ were included in this analysis

## Sheet: Coresponders (%)
	Control				Isosakuranetin
	Contralateral		Ipsilateral		Contralateral		Ipsilateral
	WGA-	WGA+	WGA-	WGA+	WGA-	WGA+	WGA-	WGA+
M3	4.77178	6.32911	5.16605	9.375	0.24096	0	0	0
M3+A1	0.62241	1.26582	2.58303	0	0.96386	0	0	0
M3+V1	5.80913	6.32911	9.22509	32.8125	3.13253	5.12821	1.24611	0
M3+A1+V1	2.6971	2.53165	5.53506	17.1875	3.85542	2.5641	1.55763	2.12766
A1	1.65975	1.26582	1.47601	0	0.72289	5.12821	0.31153	2.12766
A1+V1	7.05394	5.06329	9.22509	7.8125	9.39759	17.9487	4.6729	17.0213
V1	44.8133	40.5063	29.8893	25	40	33.3333	35.2025	44.6808
Only K	32.5726	36.7089	36.9004	7.8125	41.6868	35.8974	57.0093	34.0425
