# Supplementary material for: Upregulation of TRPM3 in nociceptors innervating inflamed tissue
Source: eLife. 2020 Sep 3;9:e61103. doi: 10.7554/eLife.61103 (PMC7470828; doi:10.7554/eLife.61103)
Supplement: Figure 4—source data 1. [file elife-61103-fig4-data1.xlsx]

## Sheet: Responsive area per mouse
		TRPM3		TRPA1		TRPV1
	Mouse	Contralateral	Ipsilateral	Contralateral	Ipsilateral	Contralateral	Ipsilateral
	1	0	0.14579	0	0	0.10738	0.05322
	2	0.10738	0.05322	0.18158	0.3931	0.30403	1.1301
	3	0.14801	0.737	0.36119	0.64812	0.61506	3.03516
	4*	0.44435	7.69	0.07839	8.23	0.12779	8.62
	5	0.0494	2.98487	0	0.15087	0	0.02651
	6	0	0.12436	0.11559	0	0	0.15335
	7	0.11559	0.15335	0	2.23204	0	2.45883
	8	0	0.47843	0.32813	0.30772	0.27453	0.339
	9	0.09696	0.34091	0.03185	0	0.01945	0.28763
	10	0.05131	0.28763	0.23308	0	0.19779	0.0927
	11	0.03529	0.0927	0	1.16641	0	1.24594
	* High values on the ipsilateral side were topped at 3.15 in Figure 4 - figure Supplement 1 for clarity, as indicated in the figure legend.

## Sheet: Mean responsive area (%)
	Control		Isosakuranetin
	Contralateral	Ipsilateral	Contralateral	Ipsilateral
M3	0.18869	0.12755	0.03185	0.0845
M3+A1	0.02265	0.04545	0.03018	0.03438
M3+V1	0.05146	0.31705	0.02046	0.01626
M3+A1+V1	0.02126	0.79582	0.04079	0.11975
A1	0.07071	0.21237	0.06466	0.07639
A1+V1	0.07699	0.34958	0.0268	0.06399
V1	0.16448	0.88102	0.1792	0.17118
